# Supplementary material for: N,N-Dimethylformamide-stabilised palladium nanoparticles combined with bathophenanthroline as catalyst for transfer vinylation of alcohols from vinyl ether
Source: Royal Society of Chemistry journal article supplement (doi:10.1039/d1ob00369k), 2021-01-01
Supplement: d1ob00369k1.pdf [file d1ob00369k1.pdf]

Electronic Supplementary Information

***N,N*-Dimethylformamide-stabilised palladium nanoparticles  
combined with bathophenanthroline as catalyst for transfer  
vinylation of alcohols from vinyl ether**

Kazuki Tabaru,<sup>a</sup> Masato Nakatsuji,<sup>a</sup> Satoshi Itoh,<sup>a</sup> Takeyuki Suzuki,<sup>b</sup> and  
Yasushi Obora<sup>\*a</sup>

<sup>a</sup>*Department of Chemistry and Materials Engineering, Faculty of Chemistry,  
Materials and Bioengineering, Kansai University, Suita, Osaka 564-8680, Japan*

<sup>b</sup>*The Institute of Scientific and Industrial Research, Osaka University, Ibaraki, Osaka  
567-0047, Japan*

**Table of Contents**

|      |                                                          |
|------|----------------------------------------------------------|
| S2:  | General Information                                      |
| S2:  | Experimental Procedure                                   |
| S4:  | DLS Curves of Recycled Pd NPs                            |
| S5:  | Reaction Mechanism                                       |
| S6:  | Spectral Data                                            |
| S11: | Copies of <sup>1</sup> H and <sup>13</sup> C NMR Spectra |
| S30: | References                                               |

.....

## General Information

GLC analyses were performed on a Shimadzu GC-2010 with flame ionization detector using a 0.22 mm  $\times$  25 m capillary column (BP-5). All NMR spectra were measured at 400 and 100 MHz, in CDCl<sub>3</sub> with TMS as an internal standard. Products were characterized by <sup>1</sup>H NMR, <sup>13</sup>C NMR, and GC–MS. The product yields were estimated from the peak areas based on the internal standard technique using GC. Transmission electron microscopy (TEM) images were obtained with a JEOL JEM-ARM200F instrument at an acceleration voltage of 200 kV. Dynamic light scattering (DLS) analyses were carried out with a Malvern Zetasizer ZSP instrument at 25°C in *n*-butyl vinyl ether or methanol, which was analysed using a cumulant method.

All starting materials were commercially available and used without purification. Compounds **3a**,<sup>1</sup> **3b**,<sup>2</sup> **3c**,<sup>3</sup> **3d**,<sup>2</sup> **3e**,<sup>4</sup> **3f**,<sup>5</sup> **3h**,<sup>3</sup> **3i**,<sup>6</sup> **3j**,<sup>7</sup> **3k**,<sup>8</sup> **3l**,<sup>2</sup> **3n**,<sup>2</sup> **3p**,<sup>4</sup> **3q**,<sup>9</sup> **4a**,<sup>10</sup> were reported previously and **3g**, **3m**, **3o**, **4c** were characterised by <sup>1</sup>H NMR, <sup>13</sup>C NMR, GC–MS, IR and HRMS. High-resolution mass spectra were obtained at the Global Facility Center, Hokkaido University.

## Experimental Procedure

**Typical reaction procedure for Pd NP-catalysed transfer vinylation of benzyl alcohol (1a) from *n*-butyl vinyl ether (2); Table 1, entry 5:** Pd NPs (1 mM) in DMF (1 mL) was added to a Schlenk tube and the solvent was evaporated. After evaporation, Cu(OAc)<sub>2</sub> (9.1 mg, 5 mol%) and **1a** (108.1 mg, 1.0 mmol) was added, followed by adding bathophenanthroline (33.2 mg, 10 mol%) and **2** (1 mL, 7.9 mmol). The mixture was stirred at 120°C for 24 h under Ar (balloon). The yield of product was estimated from peak areas based on an internal standard (*n*-octane or *n*-pentadecane) using GC. The reaction mixture was evaporated and the product was isolated by silica gel column chromatography (*n*-hexane : EtOAc = 99 : 1). The product was obtained in 73% yield as a colourless oil.

**Preparation of 0.1 M aqueous PdCl<sub>2</sub> (A):** PdCl<sub>2</sub> (177.3 mg, 1.0 mmol) was dissolved in distilled water (9 mL) and HCl (1 mL). The solution stood at room temperature overnight.

**Synthesis of DMF-stabilized Pd NPs (1 mM):** DMF (50 mL) was added to a 300-mL, three-neck, round-bottom flask, and the solution was preheated at 140°C ( $\pm$  2°C). The resulting yellow solution was used as Pd NPs (1 mM) in DMF for further reactions.

### Preparation of samples for DLS

The corresponding Pd NPs were evaporated *in vacuo* and dissolved in *n*-butyl vinyl ether or methanol. The solution was filtered with a Whatman inorganic membrane filter Anotop 25 and transferred to a glass cell.

### Preparation of samples for TEM

After the corresponding reaction, DMF (1 mL) was added to the reaction mixture followed by extraction with hexane (8×4 mL). The DMF layer was evaporated *in vacuo* and dissolved in ethanol. A drop of Pd NPs was placed on a Cu grid.

### Preparation of the sample for TEM and DLS (Recycled Pd NPs)

Pd NPs (1 mM) in DMF (1 mL) was added to a Schlenk tube and the solvent was evaporated. After evaporation, Cu(OAc)<sub>2</sub> (9.1 mg, 5 mol%) and **1a** (108.1 mg, 1.0 mmol) were added, followed by adding bathophenanthroline (33.2 mg, 10 mol%) and **2** (1 mL, 7.9 mmol). The mixture was stirred at 120°C for 24 h under Ar (balloon). After the reaction, DMF (1 mL) was added to the reaction mixture followed by extraction with hexane (8 mL×4). The solution was evaporated *in vacuo* and Cu(OAc)<sub>2</sub> (9.1 mg, 5 mol%), **1a** (108.1 mg, 1 mmol) and **2** (1 mL, 7.9 mmol) were added in accordance with the aforementioned procedure. After five rounds of recycling, DMF (1 mL) was added to the reaction solution and extracted with hexane (8 mL×4). The DMF layer was diluted with DMF and centrifuged (3000 g, 10 min). After removed the solids, the sample was used in accordance with the aforementioned procedure.

### Recycling experiments

Pd NPs (1 mM) in DMF (1 mL) was added to a Schlenk tube and the solvent was evaporated. After evaporation, Cu(OAc)<sub>2</sub> (6.8 mg, 3.8 mol%) and **1a** (108.1 mg, 1.0 mmol) were added, followed by adding bathophenanthroline (33.2 mg, 10 mol%) and **2** (1 mL, 7.9 mmol). The mixture was stirred at 120°C for 24 h under Ar (balloon). After the reaction, DMF (1 mL) was added to the reaction mixture followed by extraction with hexane (8 mL×4). The solution was evaporated *in vacuo* and Cu(OAc)<sub>2</sub> (6.8 mg, 3.8 mol%), **1a** (108.1 mg, 1 mmol) and **2** (1 mL, 7.9 mmol) were added in accordance with the aforementioned procedure.

## DLS curves

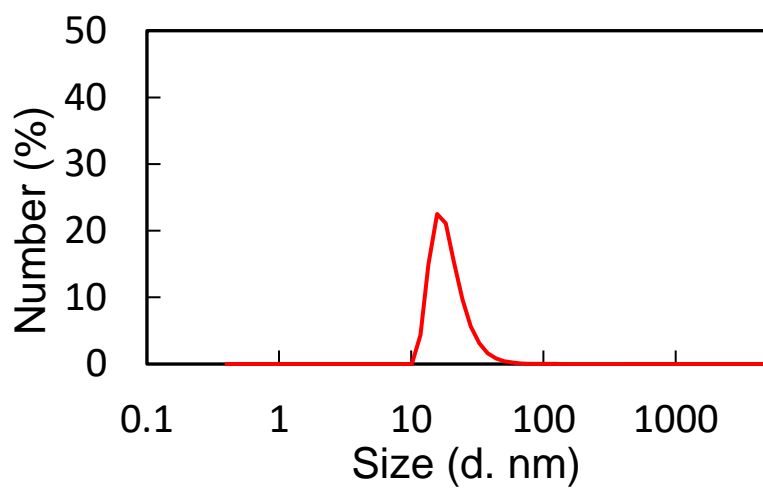

**Figure S1 DLS curves of recycled Pd NPs (1mM) measured in *n*-butyl vinyl ether at 25°C**

The population of recycled Pd NPs centred at 14–15 nm.

## Reaction Mechanism

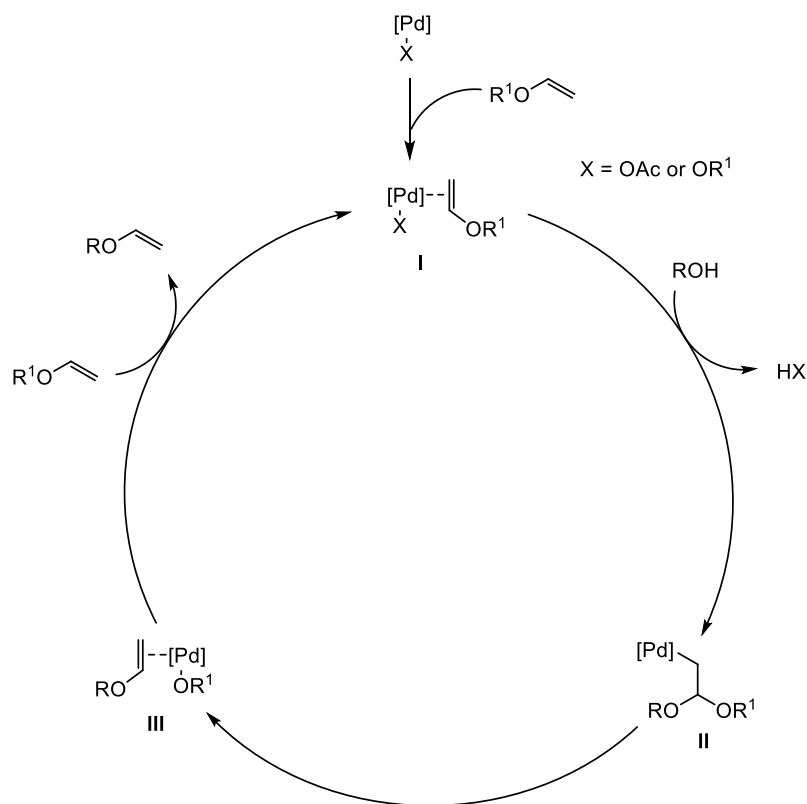

**Figure S2 Palladium-catalysed transfer vinylation of alcohols from vinyl ether**

## Plausible reaction mechanisms of acetals (4)

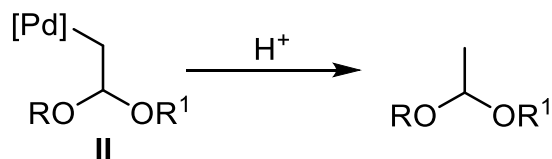

**Figure S3 Decomposition of Pd-alkyl species followed by production of acetal**

Pd-alkyl species generated from vinyl ether and alcohol decomposed in acid, and gave the corresponding acetal.<sup>11</sup>

## Spectra Data

**3a<sup>1</sup>**: yield 73% (97.9 mg), colourless oil.

<sup>1</sup>H NMR (400 MHz; CDCl<sub>3</sub>)  $\delta$ : 7.37-7.31 (m, 5H), 6.56 (dd,  $J$  = 14.3, 6.9 Hz, 1H), 4.75 (s, 2H), 4.30 (dd,  $J$  = 14.3, 2.1 Hz, 1H), 4.08 (dd,  $J$  = 6.8, 2.1 Hz, 1H); <sup>13</sup>C NMR (100 MHz; CDCl<sub>3</sub>)  $\delta$  151.6 (CH), 136.8 (C), 128.5 (CH), 127.9 (CH), 127.6 (CH), 87.3 (CH<sub>2</sub>), 70.0 (CH<sub>2</sub>); GC-MS (EI)  $m/z$  (relative intensity) 134(1) [M]<sup>+</sup>, 91(100), 65(14), 105(9).

**3b<sup>2</sup>**: Yield 47% (69.7 mg), colourless oil.

<sup>1</sup>H NMR (400 MHz, CDCl<sub>3</sub>):  $\delta$  7.24 (d,  $J$  = 7.7 Hz, 2H), 7.17 (d,  $J$  = 8.2 Hz, 2H), 6.55 (dd,  $J$  = 14.0, 6.8 Hz, 1H), 4.71 (s, 2H), 4.29 (dd,  $J$  = 14.3, 2.0 Hz, 1H), 4.06 (dd,  $J$  = 6.8, 1.8 Hz, 1H), 2.34 (s, 3H); <sup>13</sup>C NMR (100 MHz, CDCl<sub>3</sub>):  $\delta$  151.7 (CH), 137.7 (C), 133.8 (C), 129.2 (CH), 127.7 (CH), 87.2 (CH<sub>2</sub>), 70.0 (CH<sub>2</sub>), 21.2 (CH<sub>3</sub>); GC-MS (EI)  $m/z$  (relative intensity) 148 (2) [M]<sup>+</sup>, 105 (100), 79 (11), 77 (10).

**3c<sup>3</sup>**: Yield 64% (121.8 mg), colourless oil.

<sup>1</sup>H NMR (400 MHz, CDCl<sub>3</sub>):  $\delta$  7.39 (d, 2H), 7.29 (d, 2H), 6.56 (dd,  $J$  = 14.4, 6.8 Hz, 1H), 4.72 (s, 2H), 4.30 (dd,  $J$  = 14.4, 2.0 Hz, 1H), 4.07 (dd,  $J$  = 6.9, 2.1 Hz, 1H), 1.31 (s, 9H); <sup>13</sup>C NMR (100 MHz, CDCl<sub>3</sub>):  $\delta$  151.7 (CH), 151.0 (C), 133.8 (C), 127.5 (CH), 125.5 (CH), 87.1 (CH<sub>2</sub>), 69.9 (CH<sub>2</sub>), 34.6 (C), 31.3 (CH<sub>3</sub>); GC-MS (EI)  $m/z$  (relative intensity) 190 (1) [M]<sup>+</sup>, 147 (100), 132 (28), 117 (25).

**3d<sup>2</sup>**: Yield 69% (113.3 mg), colourless oil.

<sup>1</sup>H NMR (400 MHz, CDCl<sub>3</sub>):  $\delta$  7.27 (d,  $J$  = 8.7 Hz, 2H), 6.89 (d,  $J$  = 8.7 Hz, 2H), 6.54 (dd,  $J$  = 14.3, 6.9 Hz, 1H), 4.67 (s, 2H), 4.29 (dd,  $J$  = 14.3, 2.0 Hz, 1H), 4.06 (dd,  $J$  = 6.9, 2.0 Hz, 1H), 3.79 (s, 3H); <sup>13</sup>C NMR (100 MHz, CDCl<sub>3</sub>):  $\delta$  159.4 (C), 151.7 (CH), 129.3 (CH), 128.9 (C), 113.9 (CH), 87.2 (CH<sub>2</sub>), 69.9 (CH<sub>2</sub>), 55.2 (CH<sub>3</sub>); GC-MS (EI)  $m/z$  (relative intensity) 164 (1) [M]<sup>+</sup>, 121 (100), 77 (10), 122 (9).

**3e<sup>4</sup>**: Yield 48% (80.9 mg), colourless oil.

<sup>1</sup>H NMR (400 MHz, CDCl<sub>3</sub>):  $\delta$  7.33 (d,  $J$  = 8.6 Hz, 2H), 7.28 (d,  $J$  = 8.7 Hz, 2H), 6.55 (dd,  $J$  = 14.3, 6.9 Hz, 1H), 4.72 (s, 2H), 4.28 (dd,  $J$  = 14.3, 2.3 Hz, 1H), 4.10 (dd,  $J$  = 6.7, 2.3 Hz, 1H); <sup>13</sup>C NMR (100 MHz, CDCl<sub>3</sub>):  $\delta$  151.4 (CH), 135.4 (C), 133.7 (C), 128.8 (CH), 128.7 (CH), 87.6 (CH<sub>2</sub>), 69.2 (CH<sub>2</sub>); GC-MS (EI)  $m/z$  (relative intensity) 168(2) [M]<sup>+</sup>, 125(100), 127(32), 89(19).

**3f<sup>5</sup>**: Yield 35% (70.8 mg), colourless oil.

<sup>1</sup>H NMR (400 MHz, CDCl<sub>3</sub>): δ 7.62 (d, *J* = 8.5 Hz, 2H), 7.47 (d, *J* = 8.0 Hz, 2H), 6.57 (dd, *J* = 14.3, 6.9 Hz, 1H), 4.82 (s, 2H), 4.30 (dd, *J* = 14.4, 2.3 Hz, 1H), 4.12 (dd, *J* = 6.8, 2.3 Hz, 1H); <sup>13</sup>C NMR (100 MHz, CDCl<sub>3</sub>): δ 151.3 (CH), 141.0 (CH), 130.0 (q, <sup>2</sup>*J*<sub>c-f</sub> = 32.4 Hz), 127.4 (CH), 125.5 (q, <sup>3</sup>*J*<sub>c-f</sub> = 3.8 Hz), 124.1 (q, <sup>1</sup>*J*<sub>c-f</sub> = 270.7 Hz) 87.8 (CH<sub>2</sub>), 69.0 (CH<sub>2</sub>); GC-MS (EI) *m/z* (relative intensity) 202(2) [M]<sup>+</sup>, 159(100), 109(36), 173(10).

**3g**: Yield 57% (101.6 mg), colourless oil.

<sup>1</sup>H NMR (400 MHz, CDCl<sub>3</sub>): δ 6.84-6.76 (m, 3H), 6.52 (dd, *J* = 14.3, 6.9 Hz, 1H), 5.94 (s, 2H), 4.64 (s, 2H), 4.28 (dd, *J* = 14.3, 2.1 Hz, 1H), 4.06 (dd, *J* = 6.9, 2.1 Hz, 1H); <sup>13</sup>C NMR (100 MHz, CDCl<sub>3</sub>): δ 151.5 (CH), 147.8 (C), 147.4 (C), 130.6 (C), 121.3 (CH), 108.4 (CH), 108.2 (CH), 101.1 (CH<sub>2</sub>), 87.4 (CH<sub>2</sub>), 70.1 (CH<sub>2</sub>); GC-MS (EI) *m/z* (relative intensity) 178(6) [M]<sup>+</sup>, 135 (100), 77 (22), 51 (14); HRMS (EI) *m/z* calcd for C<sub>10</sub>H<sub>10</sub>O<sub>3</sub> [M]<sup>+</sup> 178.0630, found 178.0631; IR (neat, cm<sup>-1</sup>) 2880, 2783, 1851, 1635, 1490, 1443, 1257, 1037, 926

**3h**<sup>3</sup>: Yield 64% (117.9 mg), colourless oil.

<sup>1</sup>H NMR (400 MHz, CDCl<sub>3</sub>): δ 7.97 (d, *J* = 8.2 Hz, 1H), 7.86 (d, *J* = 7.7 Hz, 1H), 7.82 (d, *J* = 8.1 Hz, 1H), 7.55-7.41 (m, 4H), 6.63 (dd, *J* = 14.3, 6.8 Hz, 1H), 5.17 (s, 2H), 4.42 (dd, *J* = 14.3, 2.1 Hz, 1H), 4.14 (dd, *J* = 6.8, 2.1 Hz, 1H); <sup>13</sup>C NMR (100 MHz, CDCl<sub>3</sub>): δ 151.6 (CH), 133.7 (C), 132.2 (C), 131.5 (C), 129.0 (CH), 128.6 (CH), 126.6 (CH), 126.4 (CH), 125.8 (CH), 125.2 (CH), 123.6 (CH), 87.4 (CH<sub>2</sub>), 68.6 (CH<sub>2</sub>); GC-MS (EI) *m/z* (relative intensity) 184 (7) [M]<sup>+</sup>, 141 (100), 115 (22), 142 (12).

**3i**<sup>6</sup>: Yield 76% (140.0 mg), colourless oil.

<sup>1</sup>H NMR (400 MHz, CDCl<sub>3</sub>): δ 7.84-7.80 (m, 4H), 7.49-7.44 (m, 3H), 6.60 (dd, *J* = 6.9, 14.3 Hz, 1H), 4.91 (s, 2H), 4.35 (dd, *J* = 2.2, 14.3 Hz, 1H), 4.10 (dd, *J* = 2.2, 6.9 Hz, 1H); <sup>13</sup>C NMR (100 MHz, CDCl<sub>3</sub>): δ 151.6 (CH), 134.3 (C), 133.3 (C), 133.0 (C), 128.3 (CH), 127.9 (CH), 127.7 (CH), 126.4 (CH), 126.2 (CH), 126.0 (CH), 125.3 (CH), 87.5 (CH<sub>2</sub>), 70.2 (CH<sub>2</sub>); GC-MS (EI) *m/z* (relative intensity) 184(10) [M]<sup>+</sup>, 141(100), 115(22), 142(13).

**3j**<sup>7</sup>: Yield 85% (156.7 mg), colourless oil.

<sup>1</sup>H NMR (400 MHz, CDCl<sub>3</sub>): δ 6.47 (dd, *J* = 14.6, 6.9 Hz, 1H), 4.17 (dd, *J* = 14.6, 1.8 Hz, 1H), 3.97 (dd, *J* = 14.6, 1.8 Hz, 1H), 3.67 (t, *J* = 6.6 Hz, 2H), 1.65 (quin, *J* = 6.8 Hz, 2H), 1.39-1.22 (m, 14H), 0.88 (t, *J* = 7.1 Hz, 3H); <sup>13</sup>C NMR (100 MHz, CDCl<sub>3</sub>): δ 152.0 (CH), 86.2 (CH<sub>2</sub>), 68.1 (CH<sub>2</sub>), 31.9 (CH<sub>2</sub>), 29.6 (CH<sub>2</sub>), 29.6 (CH<sub>2</sub>), 29.4 (CH<sub>2</sub>), 29.3 (CH<sub>2</sub>), 29.1 (CH<sub>2</sub>), 26.0 (CH<sub>2</sub>), 22.7 (CH<sub>2</sub>), 14.1 (CH<sub>3</sub>); GC-MS (EI) *m/z* (relative intensity) 184 (2)

$[M]^+$ , 43 (100), 57 (81), 41 (46).

**3k<sup>8</sup>**: Yield 50% (70.1 mg), colourless oil.

<sup>1</sup>H NMR (400 MHz, CDCl<sub>3</sub>):  $\delta$  6.47 (dd,  $J$  = 14.4, 6.8 Hz, 1H), 4.15 (dd,  $J$  = 14.3, 1.8 Hz, 1H), 3.95 (dd,  $J$  = 6.8, 1.8 Hz, 1H), 3.47 (d,  $J$  = 6.5 Hz, 2H), 1.79-1.60 (m, 6H), 1.45-1.11 (m, 3H), 1.02-0.90 (m, 2H); <sup>13</sup>C NMR (100 MHz, CDCl<sub>3</sub>):  $\delta$  152.2 (CH), 86.0 (CH<sub>2</sub>), 73.7 (CH<sub>2</sub>), 37.6 (CH), 29.9 (CH<sub>2</sub>), 26.5 (CH<sub>2</sub>), 25.8 (CH<sub>2</sub>); GC-MS (EI)  $m/z$  (relative intensity) 140(3)  $[M]^+$ , 55(100), 97(39), 81(28).

**3l<sup>2</sup>**: Yield 64% (94.9 mg), colourless oil.

<sup>1</sup>H NMR (400 MHz, CDCl<sub>3</sub>):  $\delta$  7.37-7.27 (m, 5H), 6.32 (dd,  $J$  = 14.2, 6.6 Hz, 1H), 4.90 (q,  $J$  = 6.5 Hz, 1H), 4.25 (dd,  $J$  = 14.2, 1.6 Hz, 1H), 3.98 (dd,  $J$  = 6.6, 1.6 Hz, 1H); <sup>13</sup>C NMR (100 MHz, CDCl<sub>3</sub>):  $\delta$  150.5 (CH), 142.9 (C), 128.5 (CH), 127.6 (CH), 125.8 (CH), 89.2 (CH), 77.4 (CH), 23.7 (CH<sub>3</sub>); GC-MS (EI)  $m/z$  (relative intensity) 148(1)  $[M]^+$ , 105(100), 79(20), 77(17).

**3m**: Yield 60% (122.6 mg), colourless oil.

<sup>1</sup>H NMR (400 MHz, CDCl<sub>3</sub>):  $\delta$  7.34-7.21 (m, 5H), 6.30 (dd,  $J$  = 14.2, 6.6 Hz, 1H), 4.68 (t,  $J$  = 6.6 Hz, 1H), 4.22 (dq,  $J$  = 14.2, 0.8 Hz, 1H), 3.94 (dq,  $J$  = 6.6, 0.8 Hz, 1H), 1.91-1.66 (m, 2H), 1.44-1.23 (m, 6H), 0.86 (t,  $J$  = 6.6 Hz, 3H); <sup>13</sup>C NMR (100 MHz, CDCl<sub>3</sub>):  $\delta$  150.9 (CH), 142.0 (C), 128.4 (CH), 127.5 (CH), 126.2 (CH), 89.1 (CH<sub>2</sub>), 81.6 (CH), 37.9 (CH<sub>2</sub>), 31.7 (CH<sub>2</sub>), 25.3 (CH<sub>2</sub>), 22.5 (CH<sub>2</sub>), 14.0 (CH<sub>3</sub>); GC-MS (EI)  $m/z$  (relative intensity) 204 (1)  $[M]^+$ , 91 (100), 161 (23), 105 (19); HRMS (EI)  $m/z$  calcd for C<sub>14</sub>H<sub>20</sub>O  $[M]^+$  204.1514, found 204.1514; IR (neat, cm<sup>-1</sup>) 2935, 2862, 1635, 1453, 1319, 1192, 1058, 830, 752, 700.

**3n<sup>2</sup>**: Yield 35% (73.6 mg), colourless oil.

<sup>1</sup>H NMR (400 MHz, CDCl<sub>3</sub>):  $\delta$  7.36-7.22 (m, 10H), 6.47 (dd,  $J$  = 14.2, 6.6 Hz, 1H), 5.83 (s, 1H), 4.35 (dd,  $J$  = 14.1, 1.9 Hz, 1H), 4.07 (dd,  $J$  = 6.7, 1.9 Hz, 1H); <sup>13</sup>C NMR (100 MHz, CDCl<sub>3</sub>):  $\delta$  150.5 (CH), 141.0 (C), 128.5 (CH), 127.7 (CH), 126.9 (CH), 90.0 (CH<sub>2</sub>), 82.7 (CH); GC-MS (EI)  $m/z$  (relative intensity) 210 (1)  $[M]^+$ , 167 (100), 152 (22), 139 (3).

**3o**: Yield 47% (80.0 mg), colourless oil.

<sup>1</sup>H NMR (400 MHz, CDCl<sub>3</sub>):  $\delta$  6.31 (dd,  $J$  = 14.1, 6.6 Hz, 1H), 4.26 (dd,  $J$  = 14.1, 1.0 Hz, 1H), 3.93 (dd,  $J$  = 6.6, 1.0 Hz, 1H), 3.69 (quin,  $J$  = 6.0 Hz, 1H), 1.60-1.46 (m, 4H), 1.40-

1.24 (m, 8H), 0.90 (t,  $J = 6.9$  Hz, 6H);  $^{13}\text{C}$  NMR (100 MHz,  $\text{CDCl}_3$ ):  $\delta$  151.8 (CH), 87.4 ( $\text{CH}_2$ ), 80.6 (CH), 34.0 ( $\text{CH}_2$ ), 27.5 ( $\text{CH}_2$ ); GC-MS (EI)  $m/z$  (relative intensity) 170 (2)  $[\text{M}]^+$ , 43 (100), 71 (59), 57 (57); HRMS (EI)  $m/z$  calcd for  $\text{C}_{11}\text{H}_{22}\text{O}$   $[\text{M}]^+$  170.1671, found 170.1671; IR (neat,  $\text{cm}^{-1}$ ) 2936, 2862, 1629, 1461, 1194, 1037, 811.

**3p**<sup>4</sup>: Yield 61% (69.0 mg), colourless oil.

$^1\text{H}$  NMR (400 MHz,  $\text{CDCl}_3$ ):  $\delta$  6.47 (dd,  $J = 14.3, 6.8$  Hz, 2H), 4.17 (dd,  $J = 14.3, 1.8$  Hz, 2H), 3.97 (dd,  $J = 6.8, 1.8$  Hz, 2H), 3.67 (t,  $J = 6.6$  Hz, 4H), 1.69-1.60 (m, 4H), 1.39-1.30 (m, 12H);  $^{13}\text{C}$  NMR (100 MHz,  $\text{CDCl}_3$ ):  $\delta$  152.0 (CH), 86.2 ( $\text{CH}_2$ ), 68.1 ( $\text{CH}_2$ ), 29.5 ( $\text{CH}_2$ ), 29.3 ( $\text{CH}_2$ ), 29.1 ( $\text{CH}_2$ ), 26.0 ( $\text{CH}_2$ ); GC-MS (EI)  $m/z$  (relative intensity) 226 (0.05)  $[\text{M}]^+$ , 55 (100), 69 (64), 83 (44); HRMS (EI)  $m/z$  calcd for  $\text{C}_{14}\text{H}_{26}\text{O}_2$   $[\text{M}]^+$  226.1933, found 226.1933; IR (neat,  $\text{cm}^{-1}$ ) 2931, 2853, 1611, 1319, 1201, 808.

**3q**<sup>9</sup>: Yield 30% (42.0 mg), pale yellow oil.

$^1\text{H}$  NMR (400 MHz,  $\text{CDCl}_3$ ):  $\delta$ : 7.31 (dd,  $J = 5.1, 1.2$  Hz, 1H), 7.05-6.99 (m, 2H), 6.53 (dd,  $J = 14.3, 6.9$  Hz, 1H), 4.91 (s, 2H), 4.32 (dd,  $J = 14.3, 2.2$  Hz, 1H), 4.11 (dd,  $J = 6.7, 2.3$  Hz, 1H),  $^{13}\text{C}$  NMR (100 MHz,  $\text{CDCl}_3$ ):  $\delta$ : 151.1 (CH), 139.0 (C), 126.9 (CH), 126.8 (CH), 126.3 (CH), 87.8 ( $\text{CH}_2$ ), 64.8 ( $\text{CH}_2$ ); GC-MS (EI)  $m/z$  (relative intensity) 140 (1)  $[\text{M}]^+$ , 97 (100), 45 (12), 53 (10).

**4a**<sup>10</sup>

$^1\text{H}$  NMR (400 MHz,  $\text{CDCl}_3$ ):  $\delta$  7.35-7.25 (m, 5H), 4.81 (q,  $J = 5.4$  Hz, 1H), 4.65 (d,  $J = 11.8$  Hz, 1H), 4.52 (d,  $J = 11.8$  Hz, 1H), 3.63-3.60 (m, 1H), 3.48-3.45 (m, 1H);  $^{13}\text{C}$  NMR (100 MHz,  $\text{CDCl}_3$ ):  $\delta$  138.5 (C), 128.4 (CH), 127.7 (CH), 127.5 (CH), 99.2 (CH), 67.0 ( $\text{CH}_2$ ), 64.9 ( $\text{CH}_2$ ), 32.0 ( $\text{CH}_2$ ), 19.8 ( $\text{CH}_2$ ), 19.5 ( $\text{CH}_2$ ), 13.9 ( $\text{CH}_3$ ); GC-MS (EI)  $m/z$  (relative intensity) 193(1)  $[\text{M}-\text{CH}_3]^+$ , 91(100), 134(27), 92(21).

**4c**

$^1\text{H}$  NMR (400 MHz,  $\text{CDCl}_3$ ):  $\delta$  7.37 (d,  $J = 8.4$  Hz, 2H), 7.28 (d,  $J = 8.3$  Hz, 2H), 4.81 (q,  $J = 5.4$  Hz, 1H), 4.62 (d,  $J = 11.6$  Hz, 1H), 4.48 (d,  $J = 11.4$  Hz, 1H), 3.62-3.59 (m, 1H), 3.47-3.44 (m, 1H), 1.61-1.39 (m, 4H), 1.36 (d,  $J = 5.4$  Hz, 3H), 1.31 (s, 9H), 0.93 (t,  $J = 7.4$  Hz, 3H);  $^{13}\text{C}$  NMR (100 MHz,  $\text{CDCl}_3$ ):  $\delta$  150.5 (C), 135.4 (C), 127.6 (CH), 125.3 (CH), 99.1 (CH), 66.8 ( $\text{CH}_2$ ), 64.8 ( $\text{CH}_2$ ), 34.5 (C), 32.0 ( $\text{CH}_2$ ), 31.4 ( $\text{CH}_3$ ), 19.8 ( $\text{CH}_3$ ), 19.5 ( $\text{CH}_2$ ), 14.0 ( $\text{CH}_3$ ); GC-MS (EI)  $m/z$  (relative intensity) 249(1)  $[\text{M}-\text{CH}_3]^+$ , 147(100), 133(95), 190(29); HRMS (EI)  $m/z$  calcd for  $\text{C}_{17}\text{H}_{28}\text{O}_2\text{Na}$   $[\text{M}+\text{Na}]^+$  287.1987, found 287.1982; IR (neat,  $\text{cm}^{-1}$ ) 2962, 2937, 2909, 2872, 1517, 1465, 1394, 1363, 1340, 1270,

1135, 1098, 1019, 918, 816.

# Copies of $^1\text{H}$ and $^{13}\text{C}$ NMR Spectra

3a

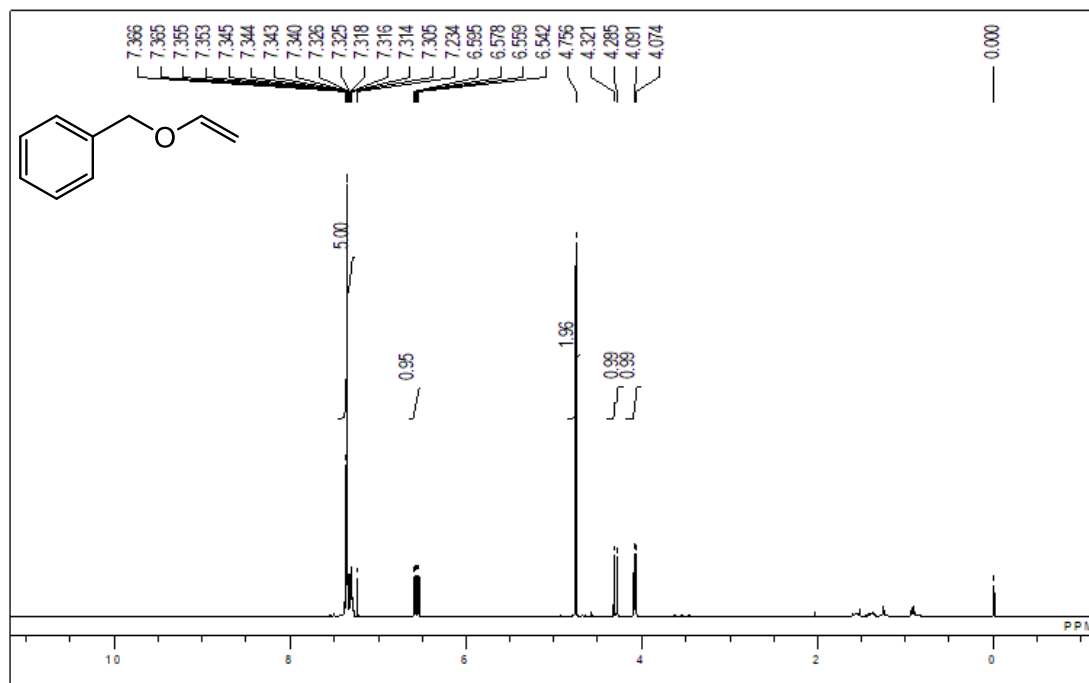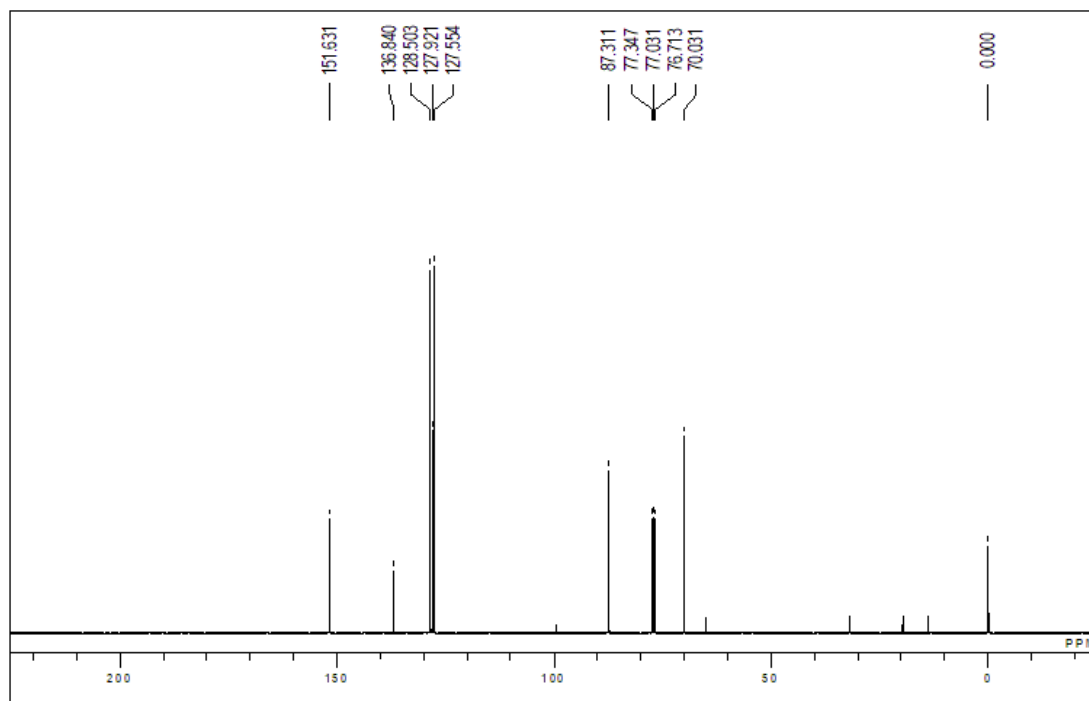

3b

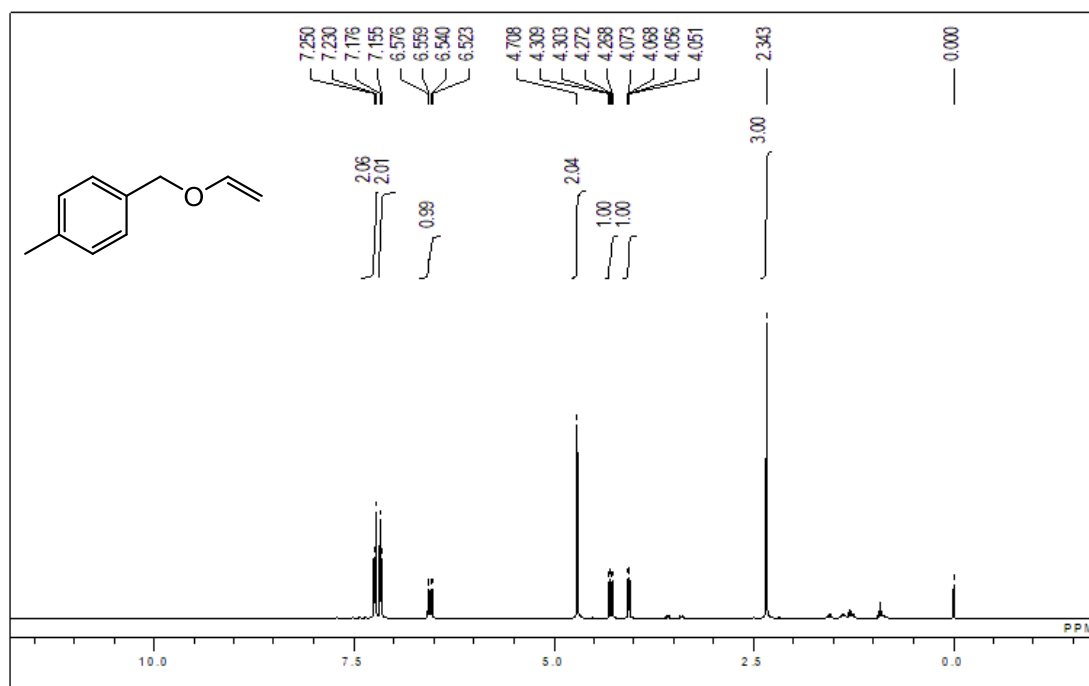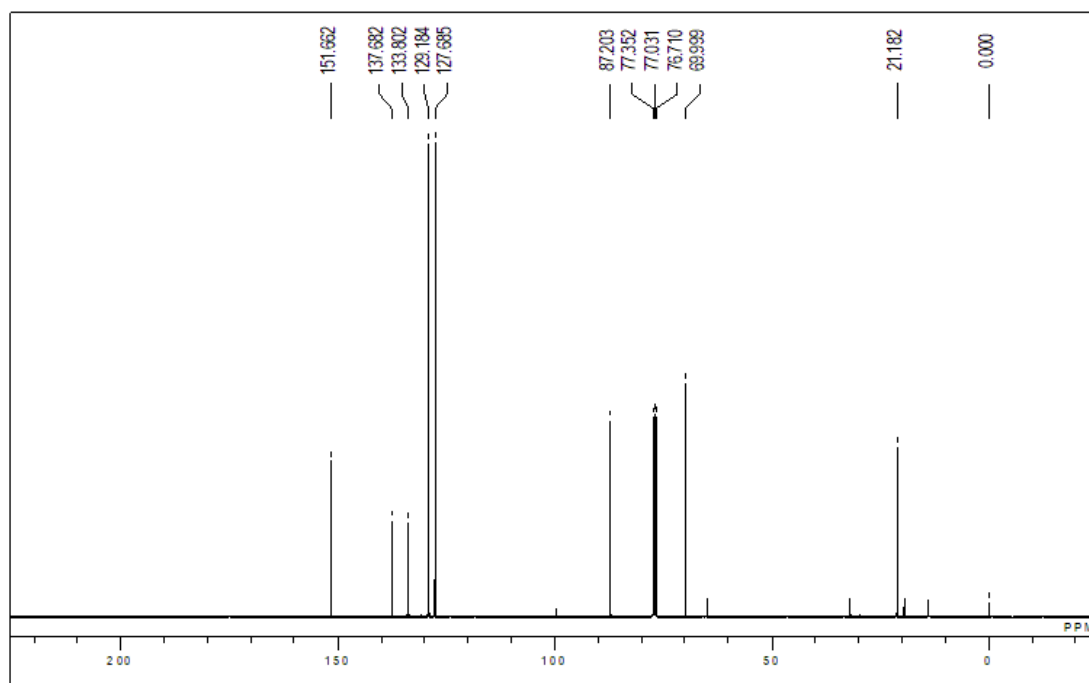

3c

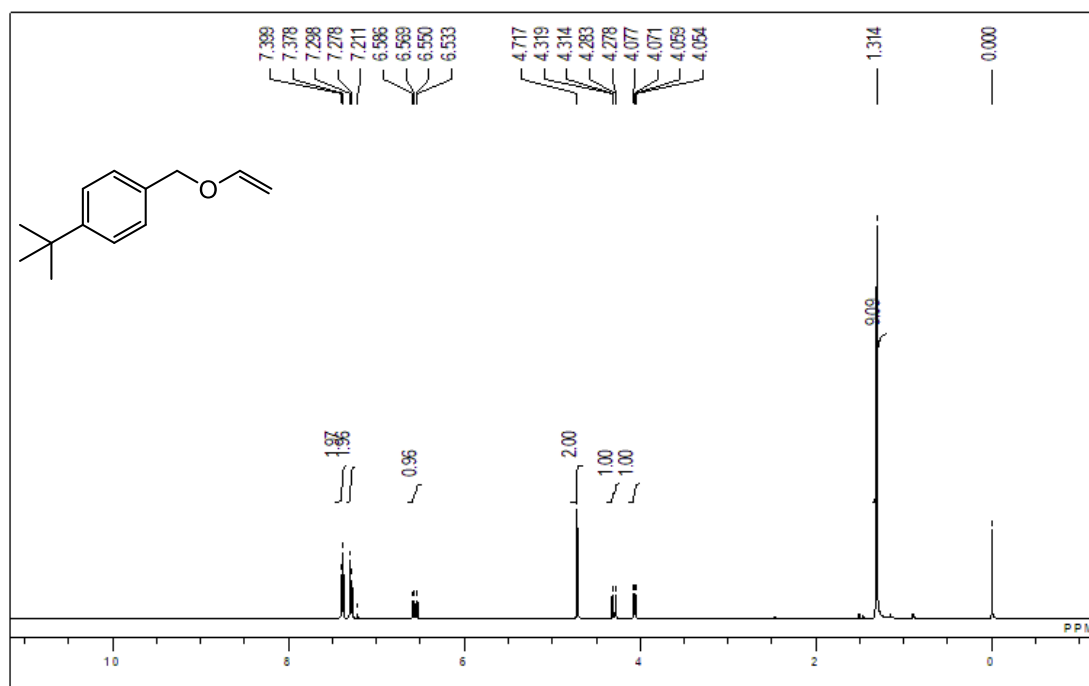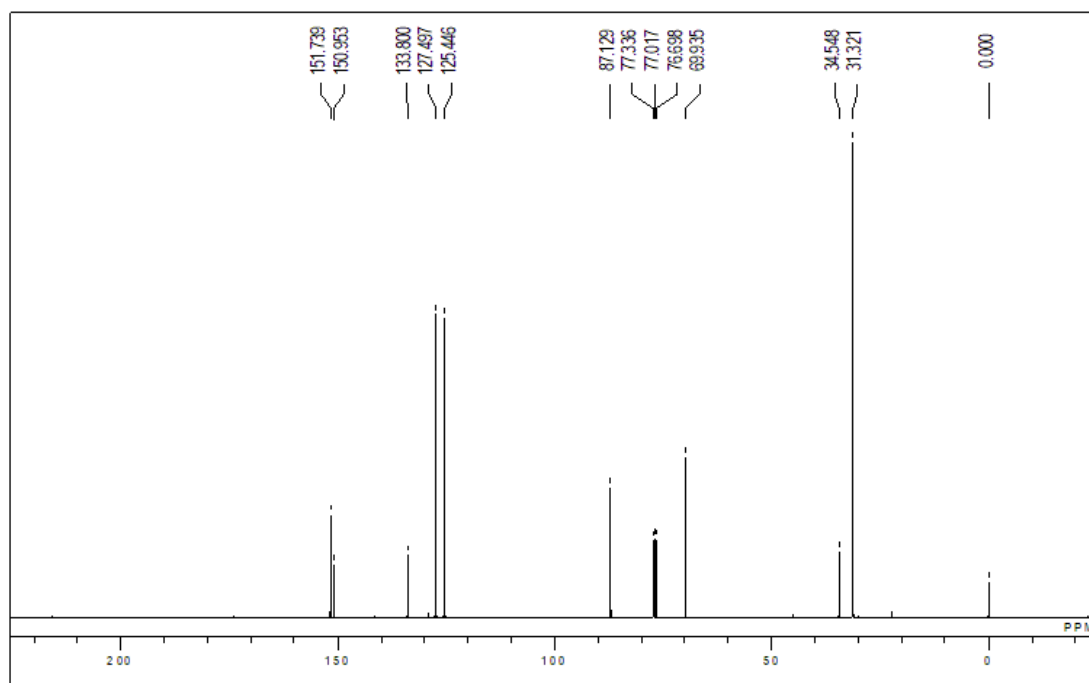

3d

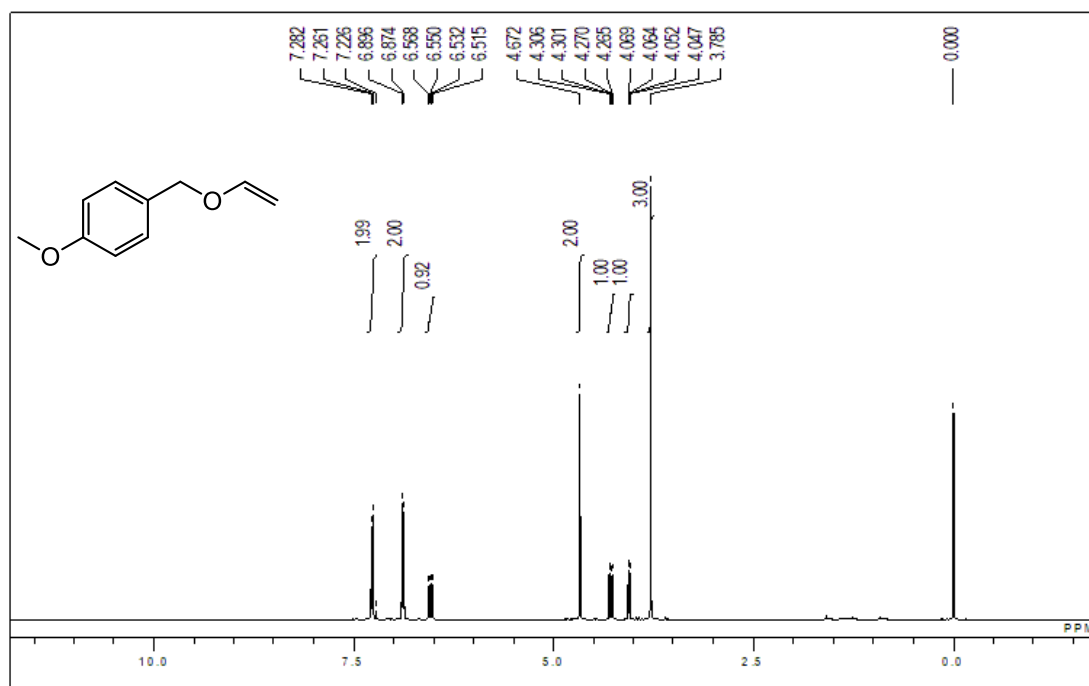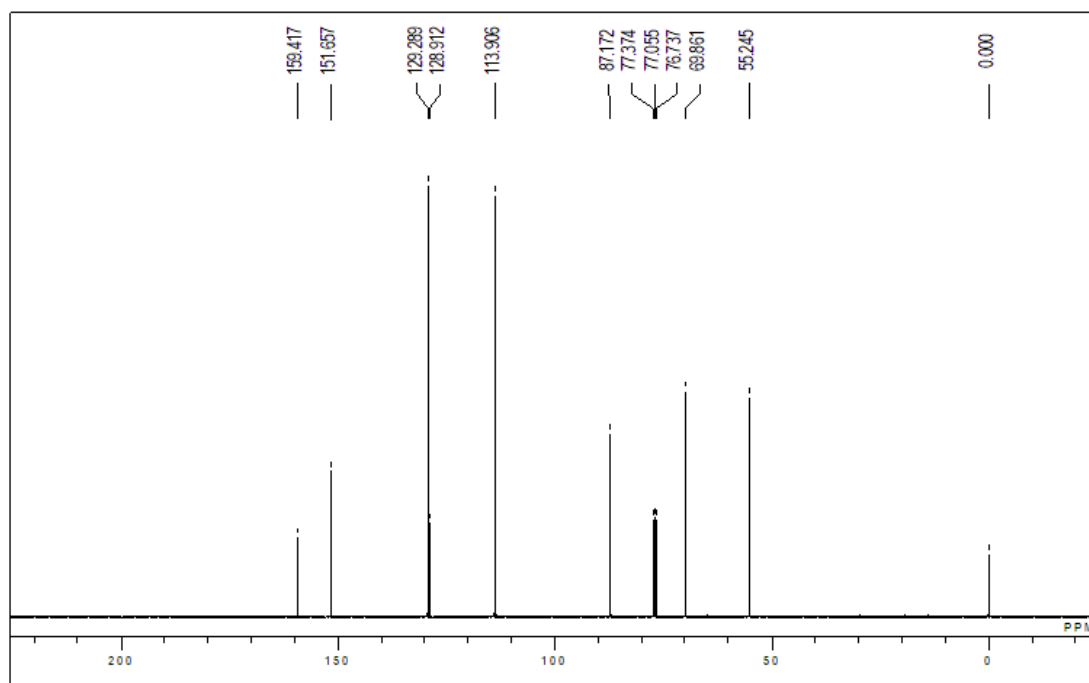

3e

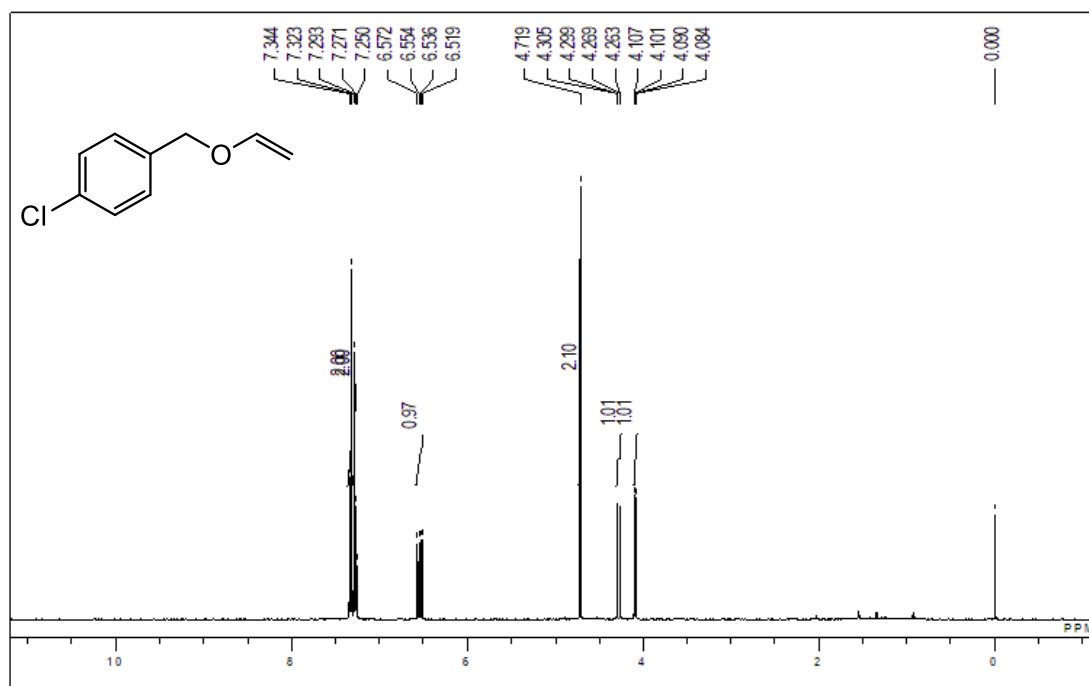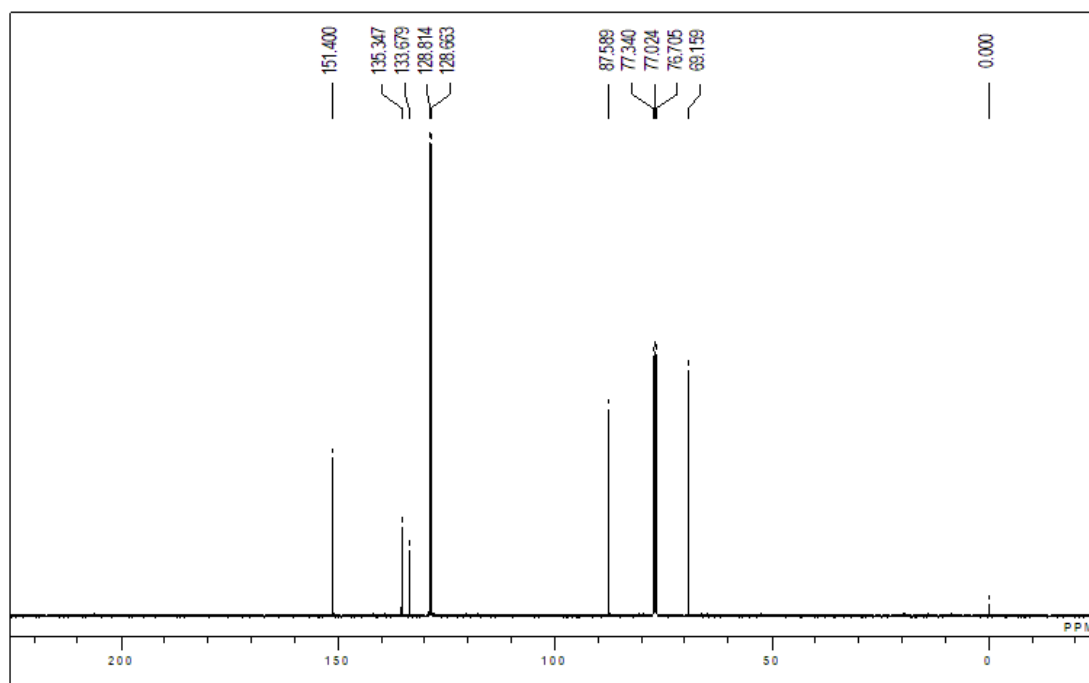

3f

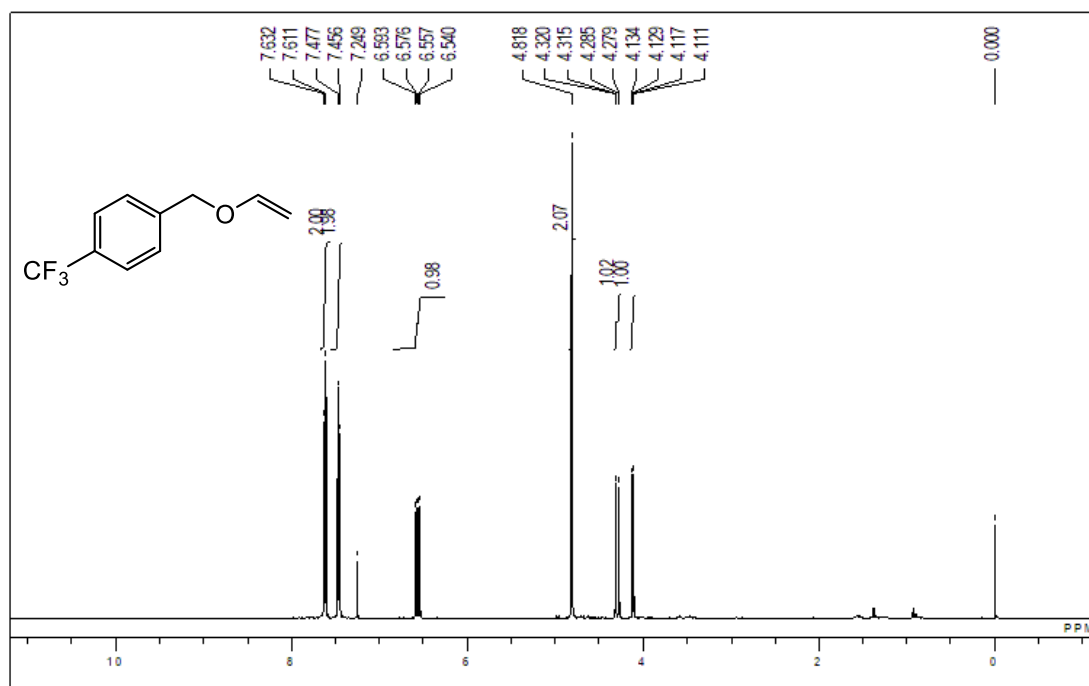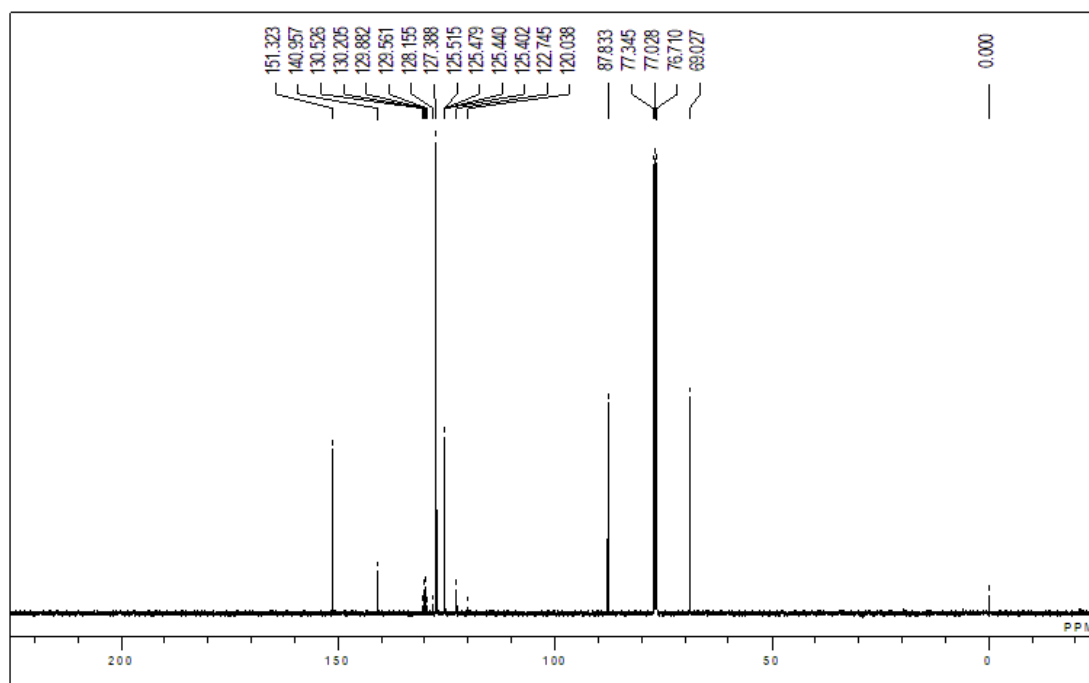

3g

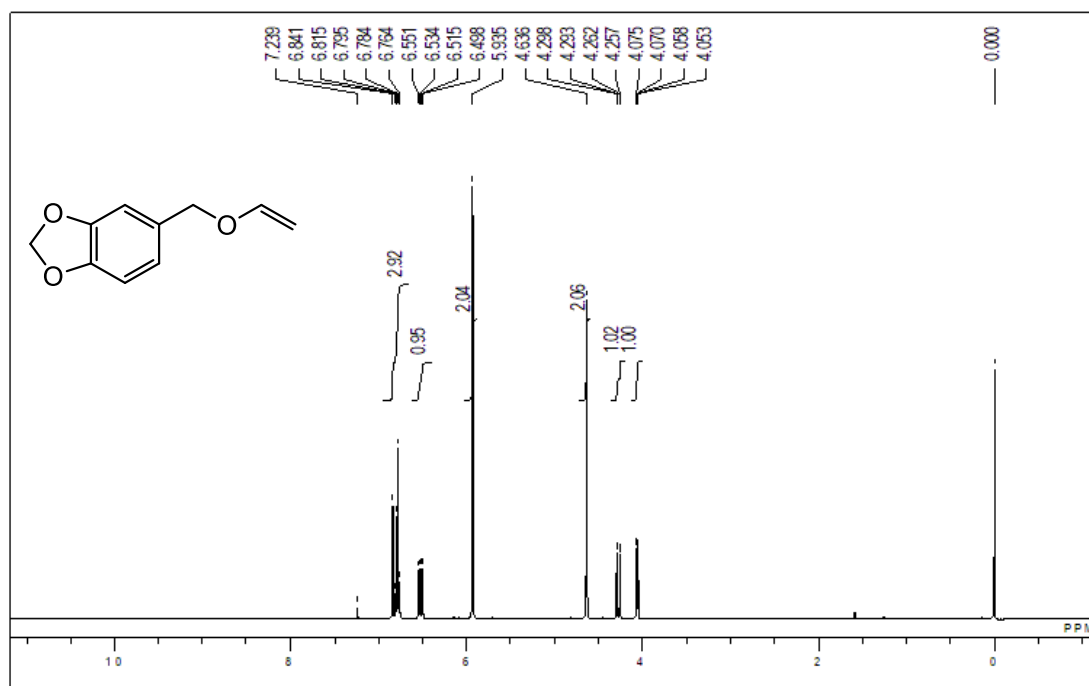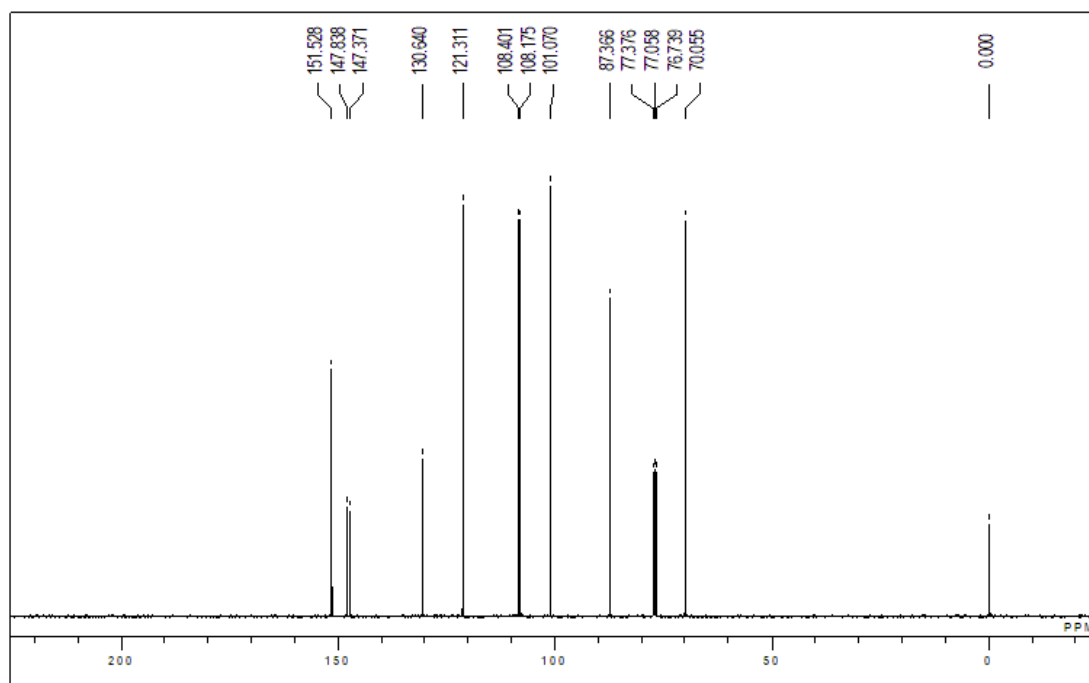

3h

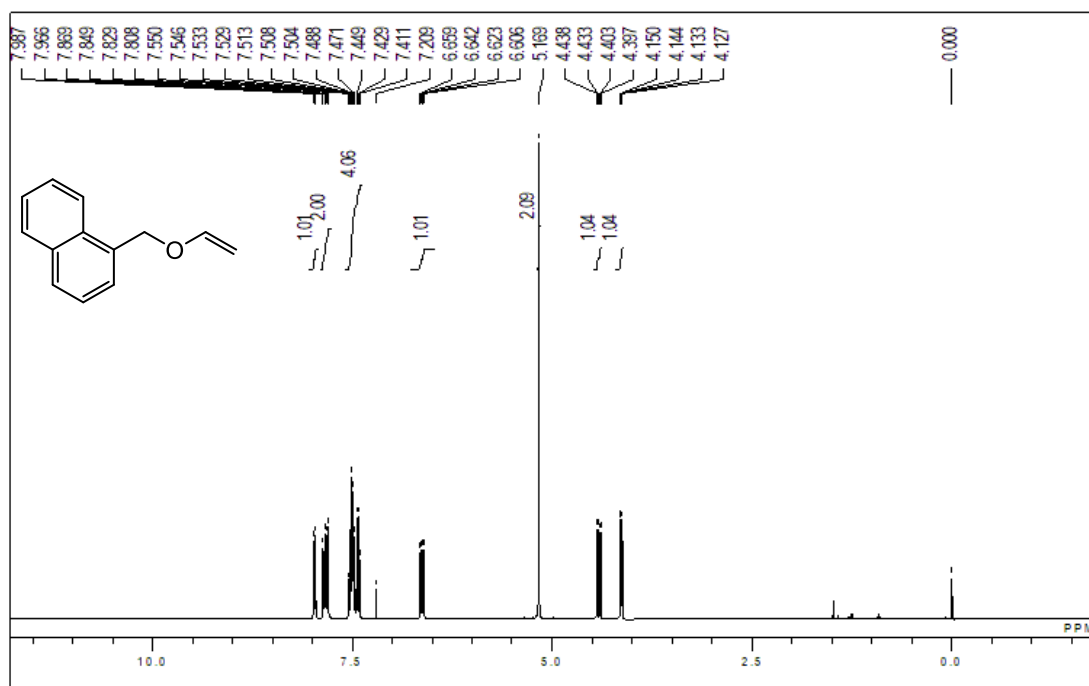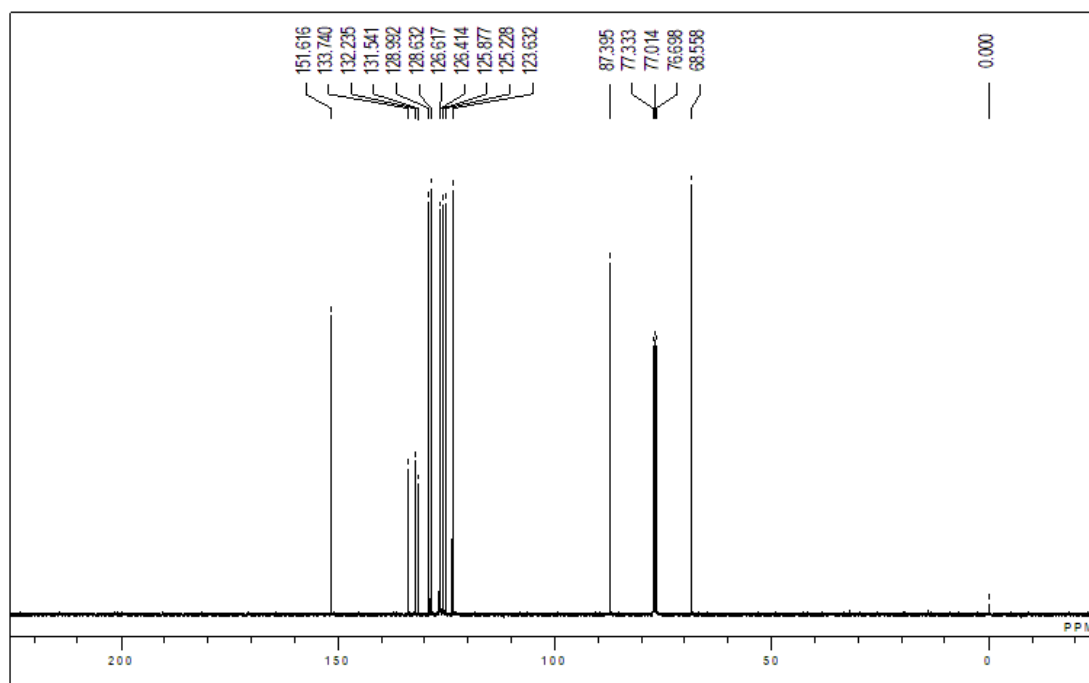

3i

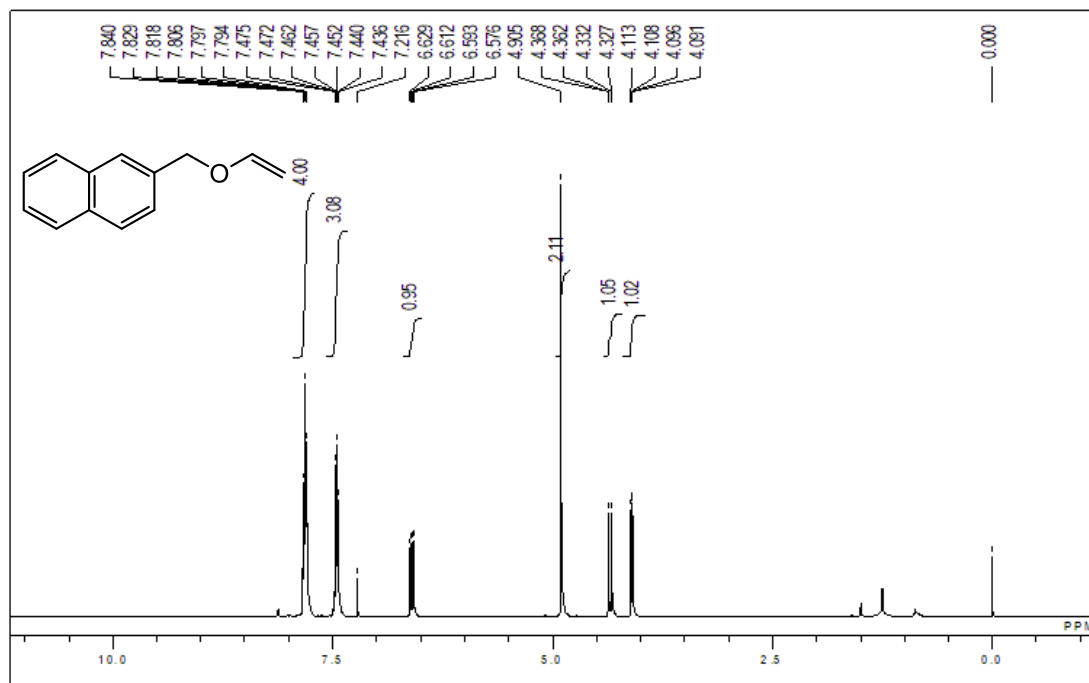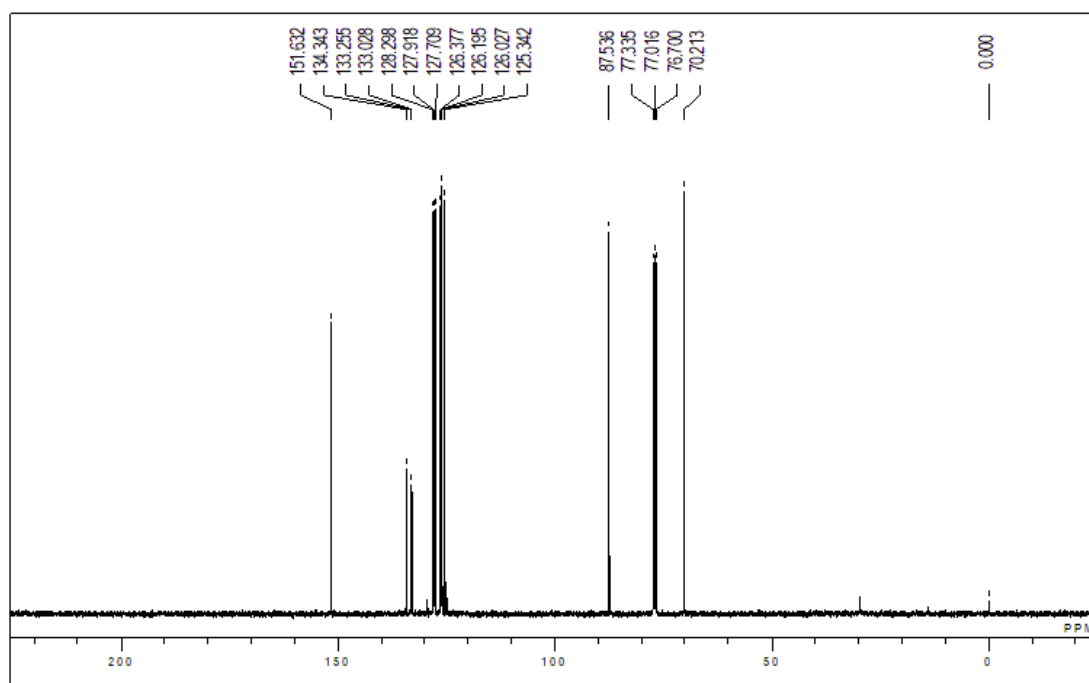

3j

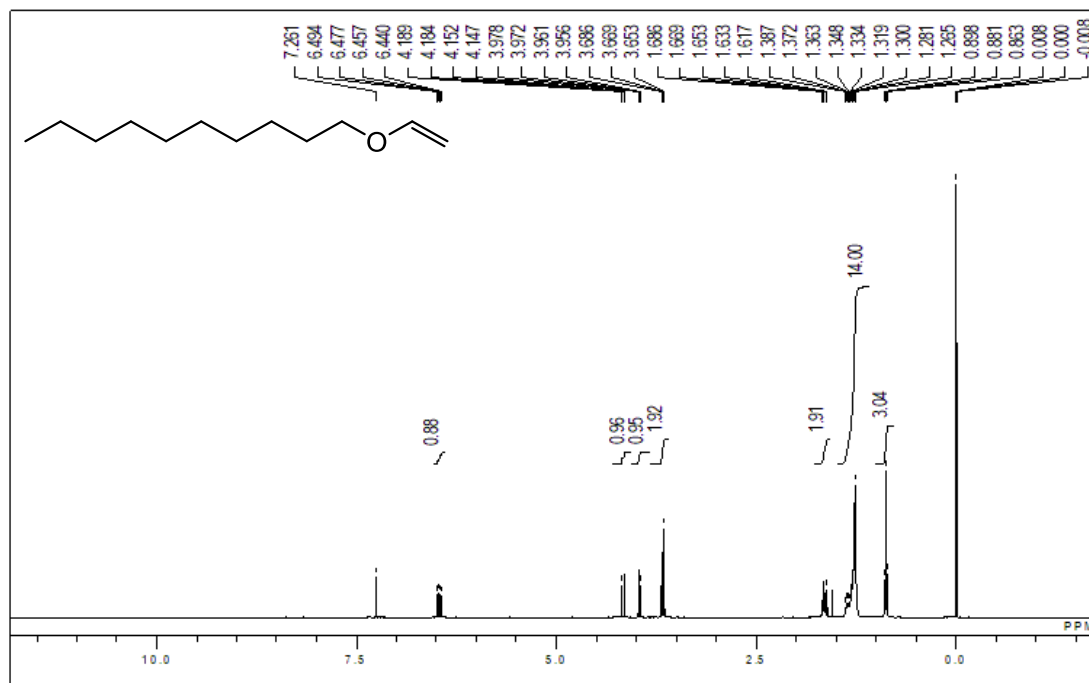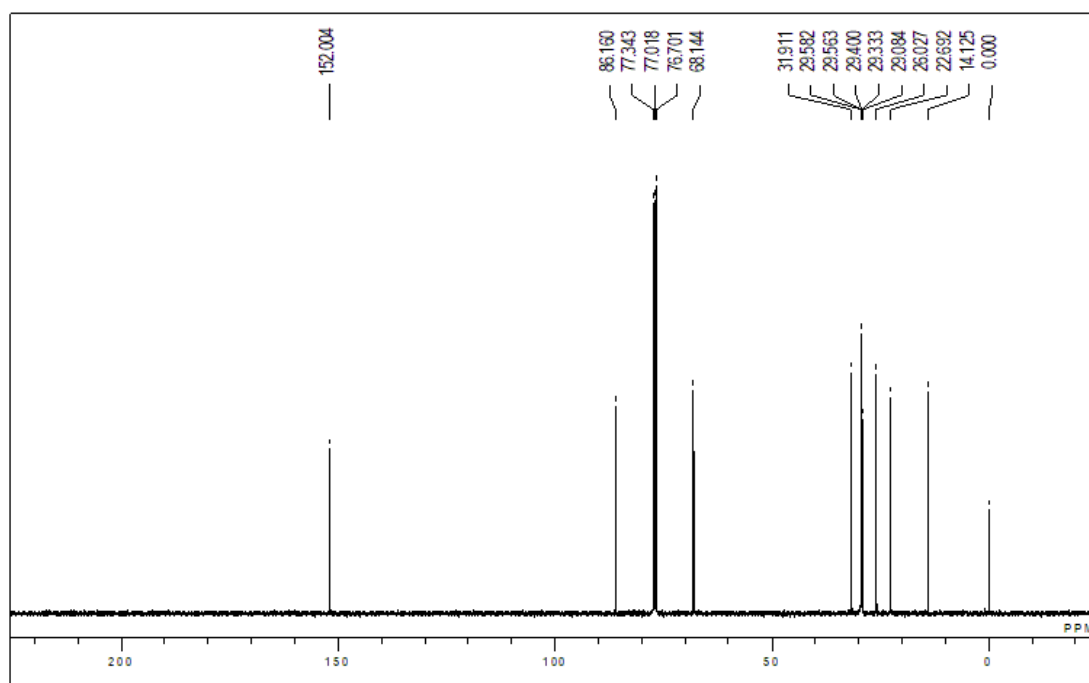

3k

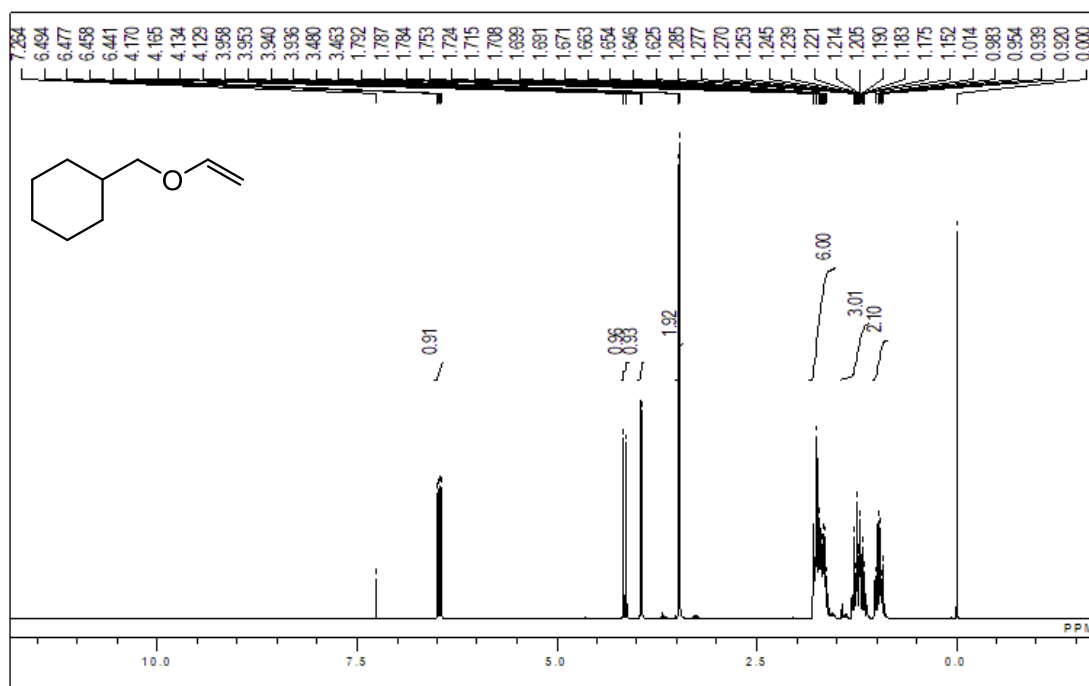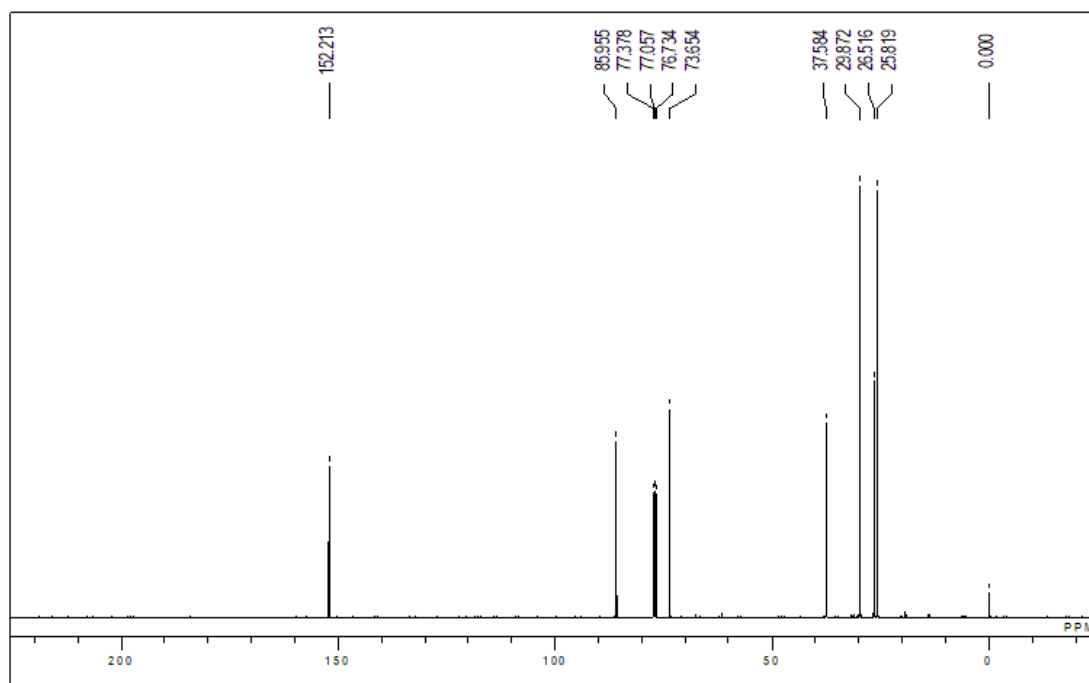

31

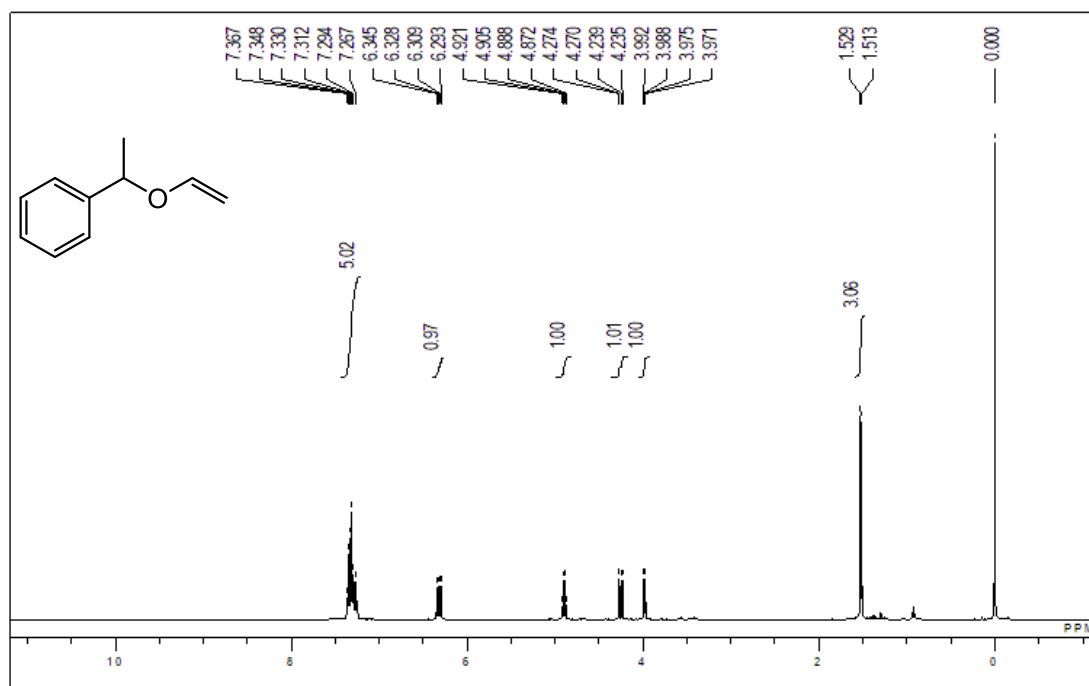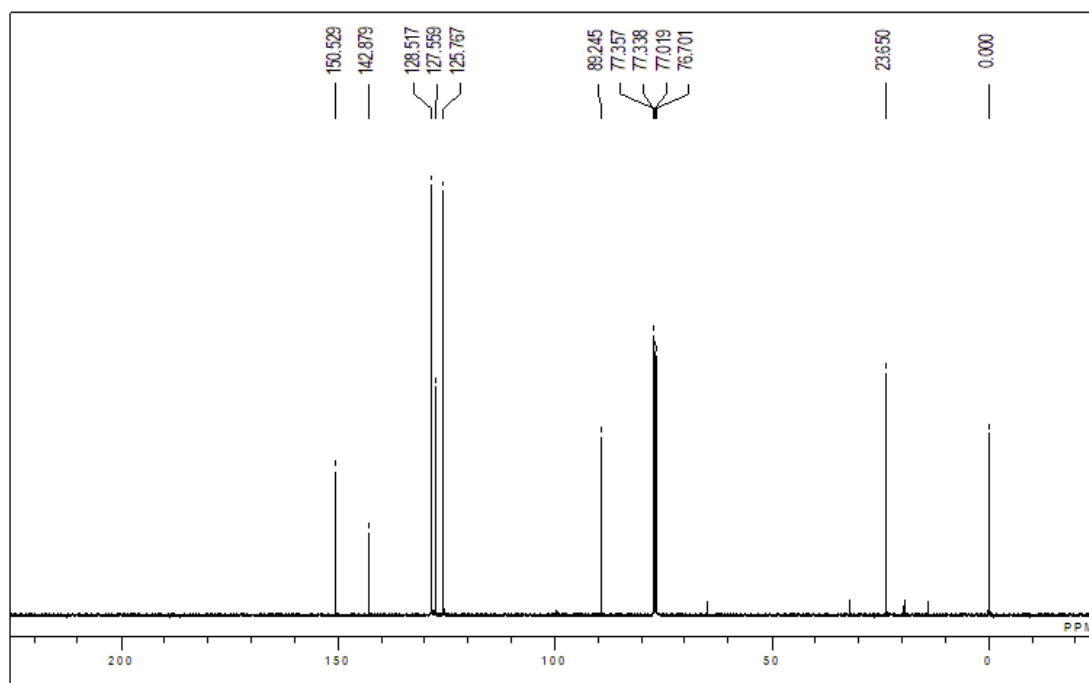

3m

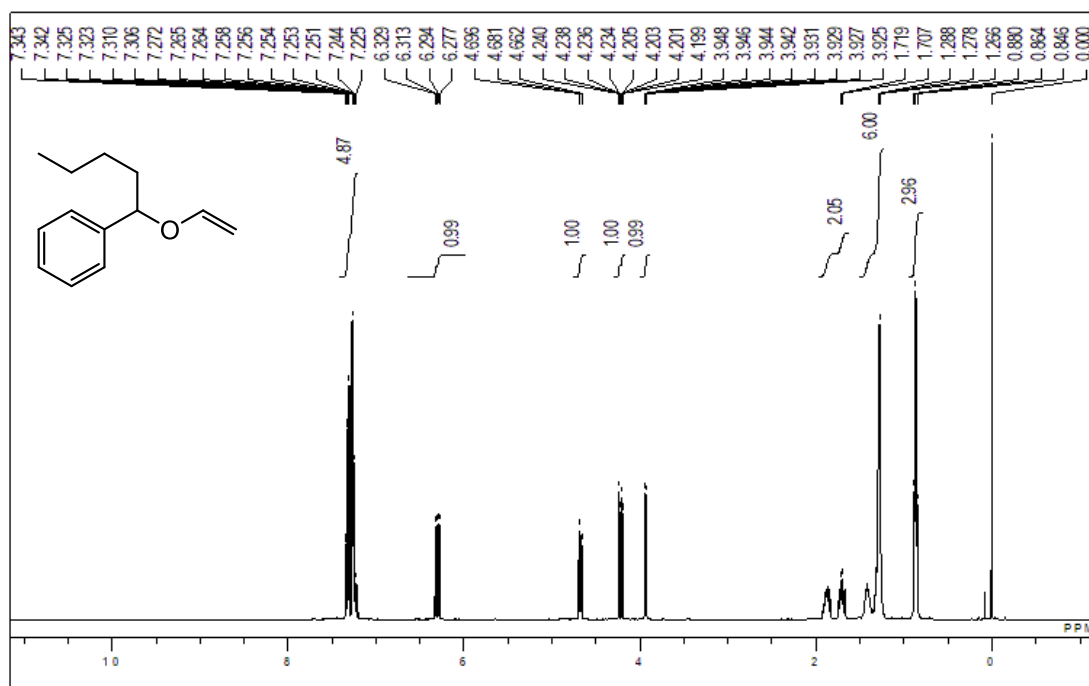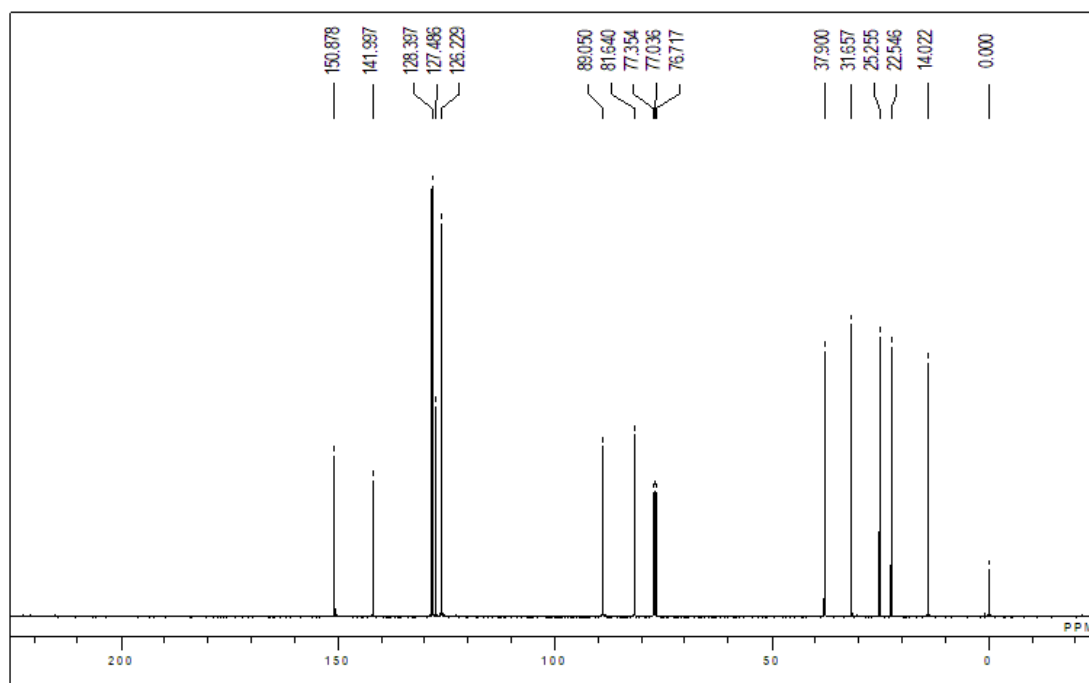

3n

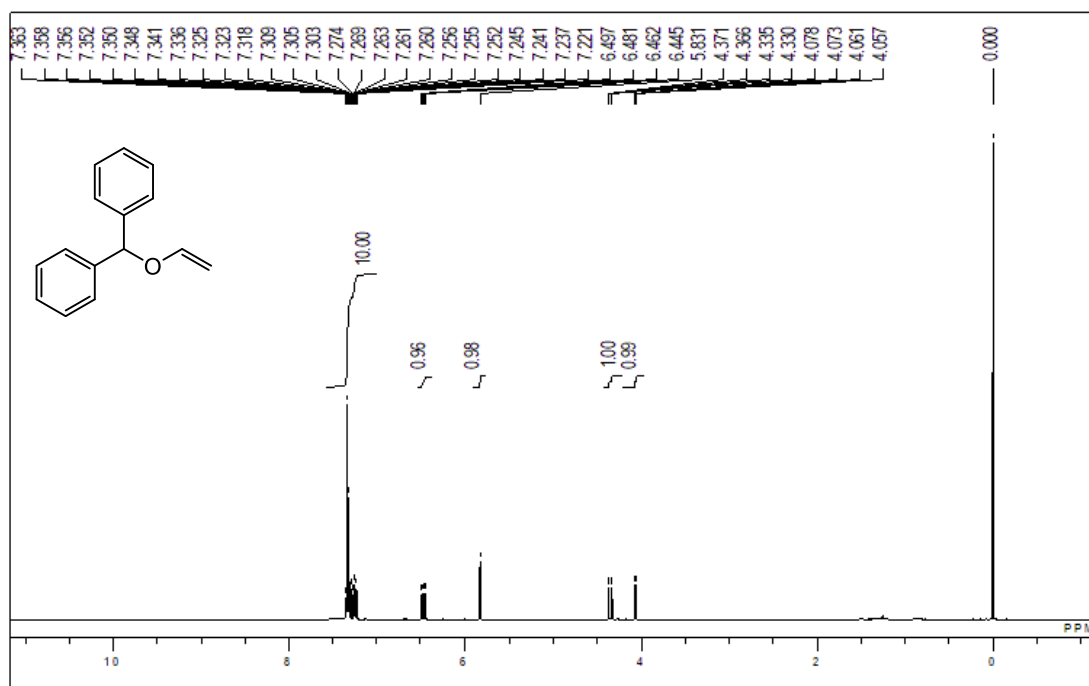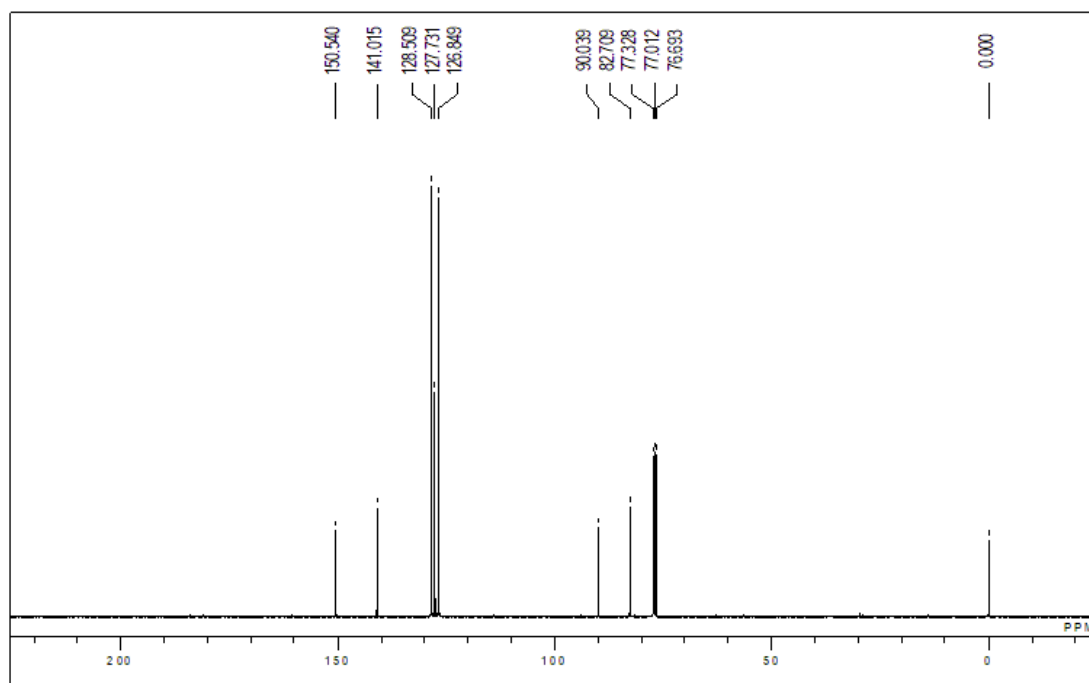

30

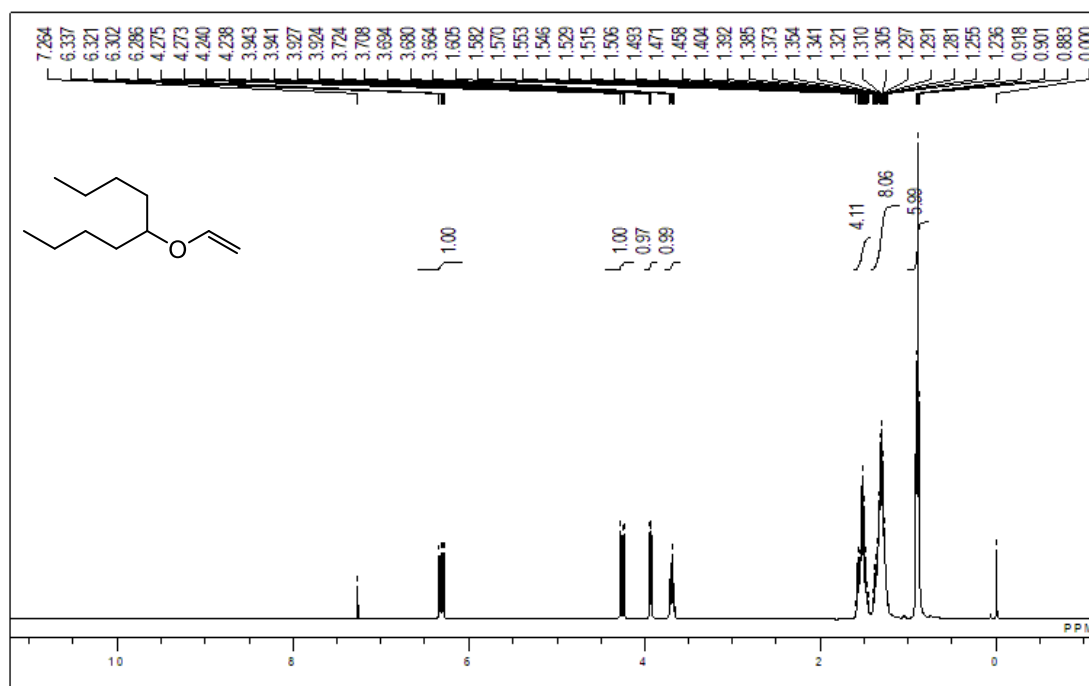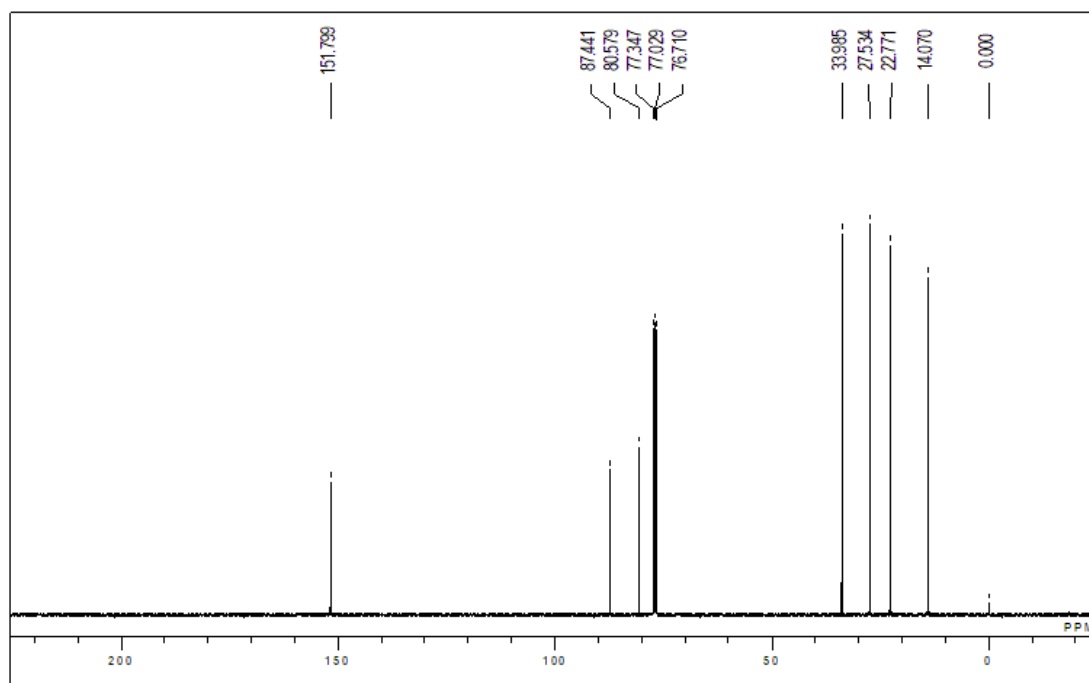

3p

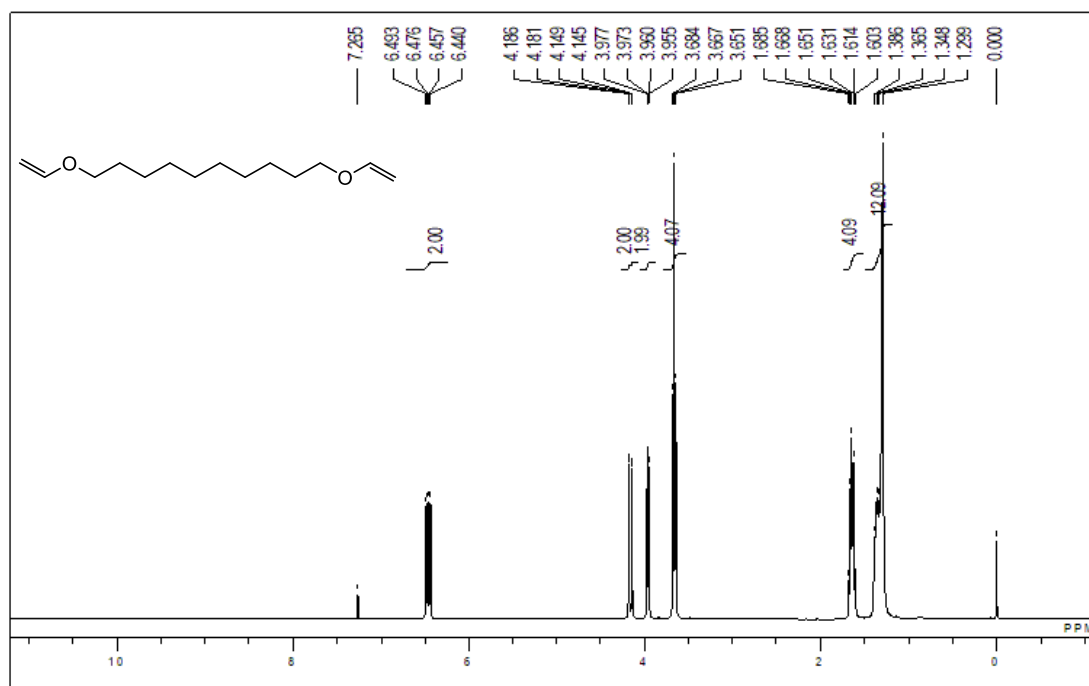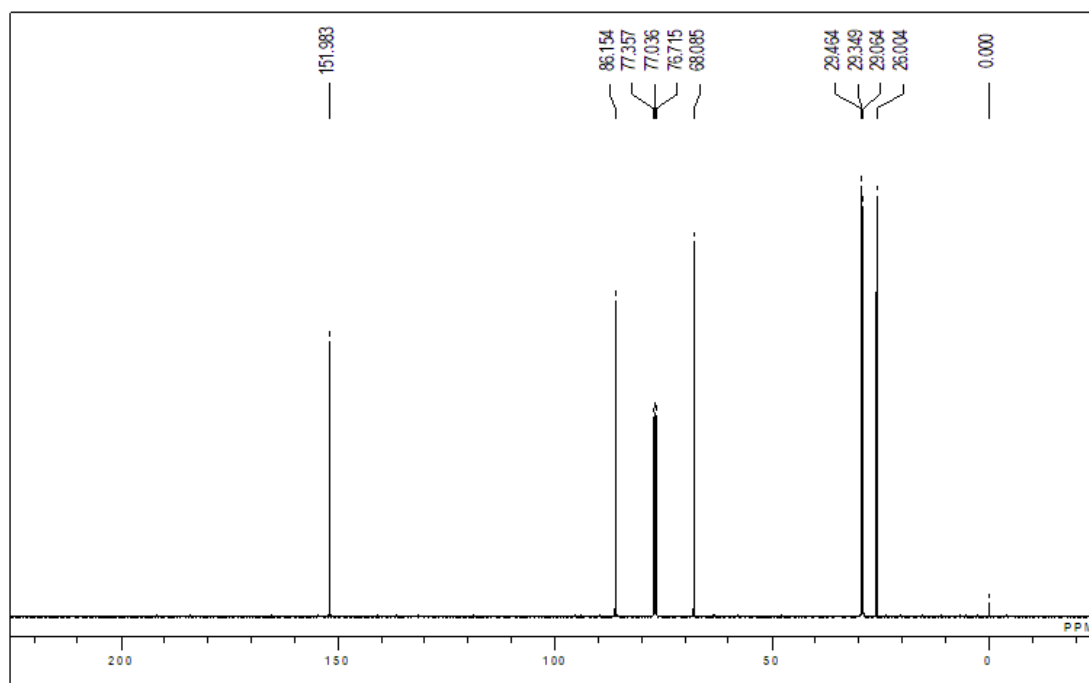

3q

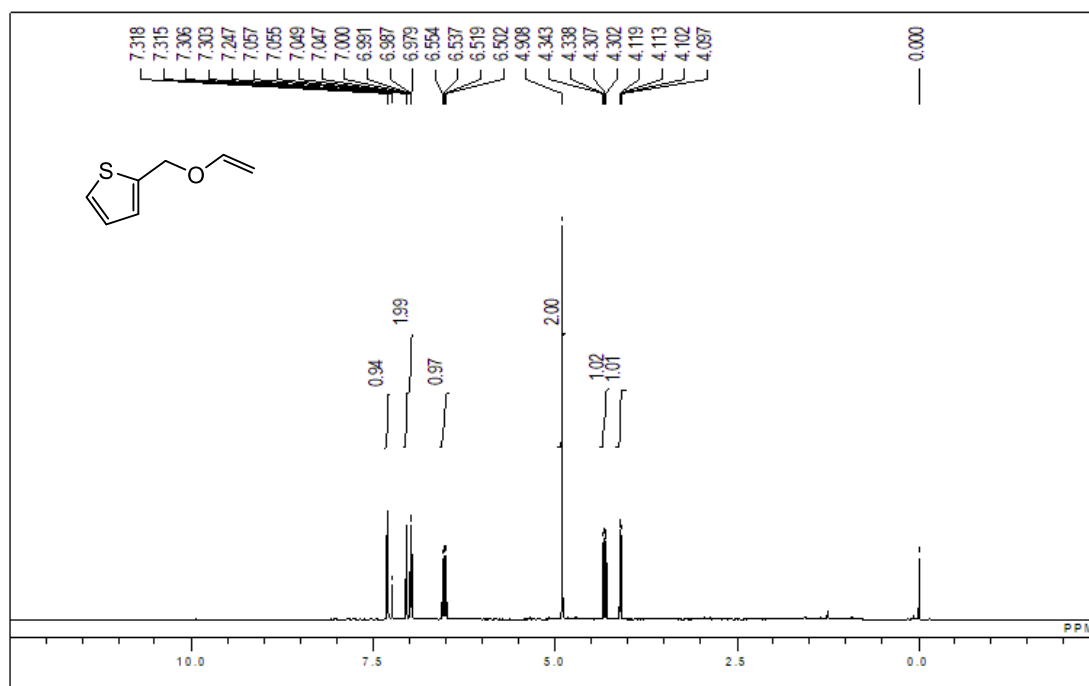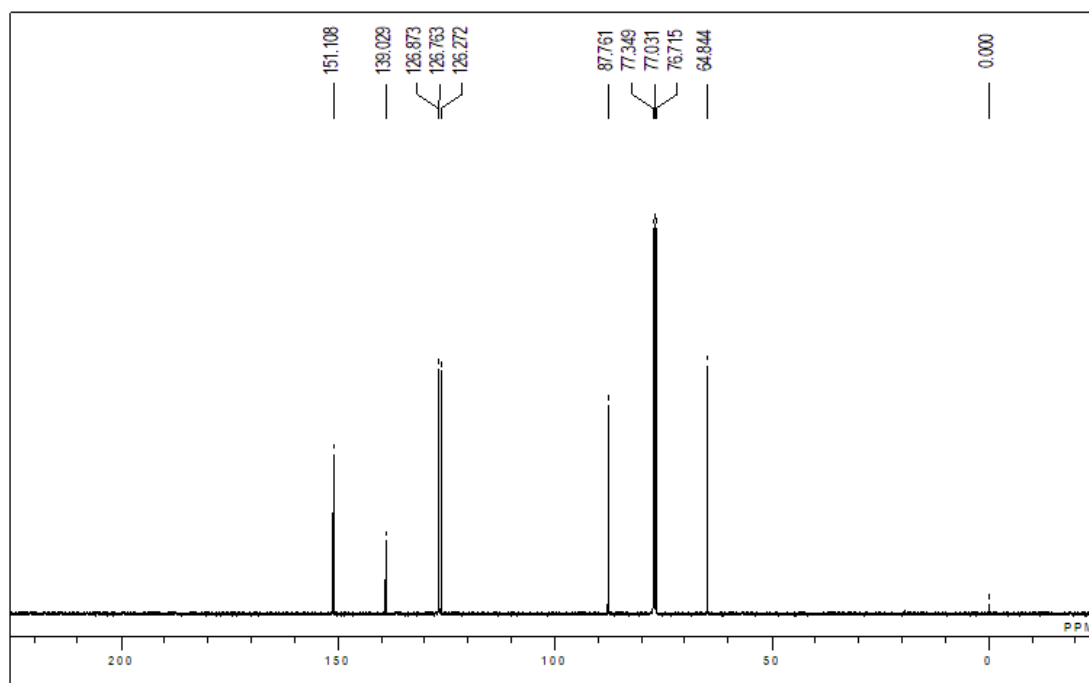

4a

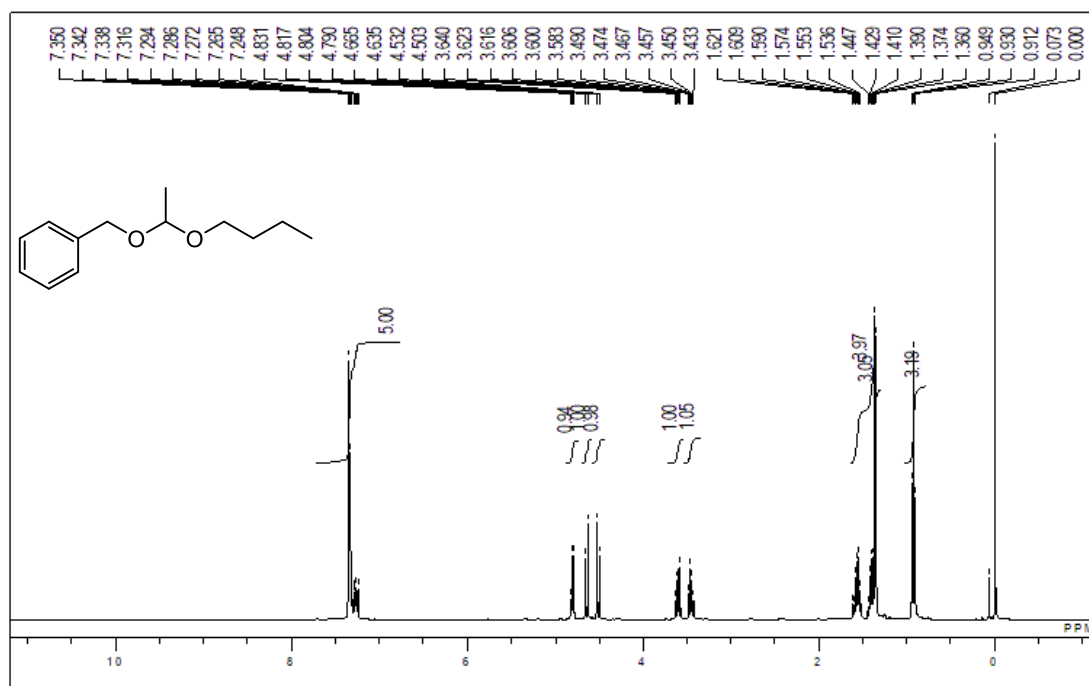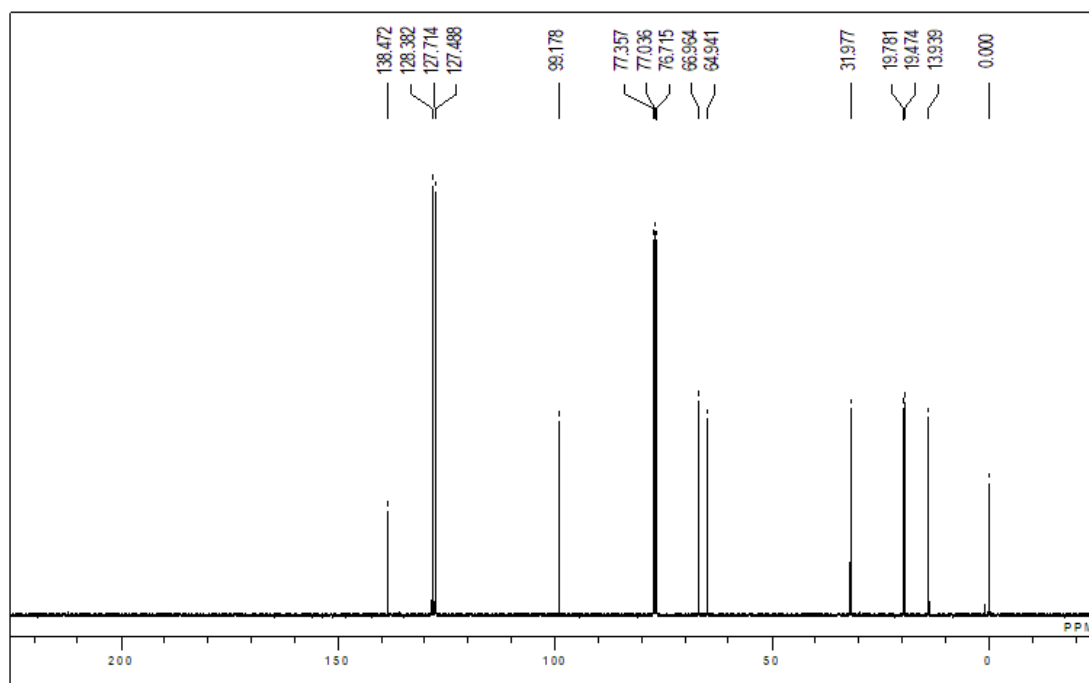

4c

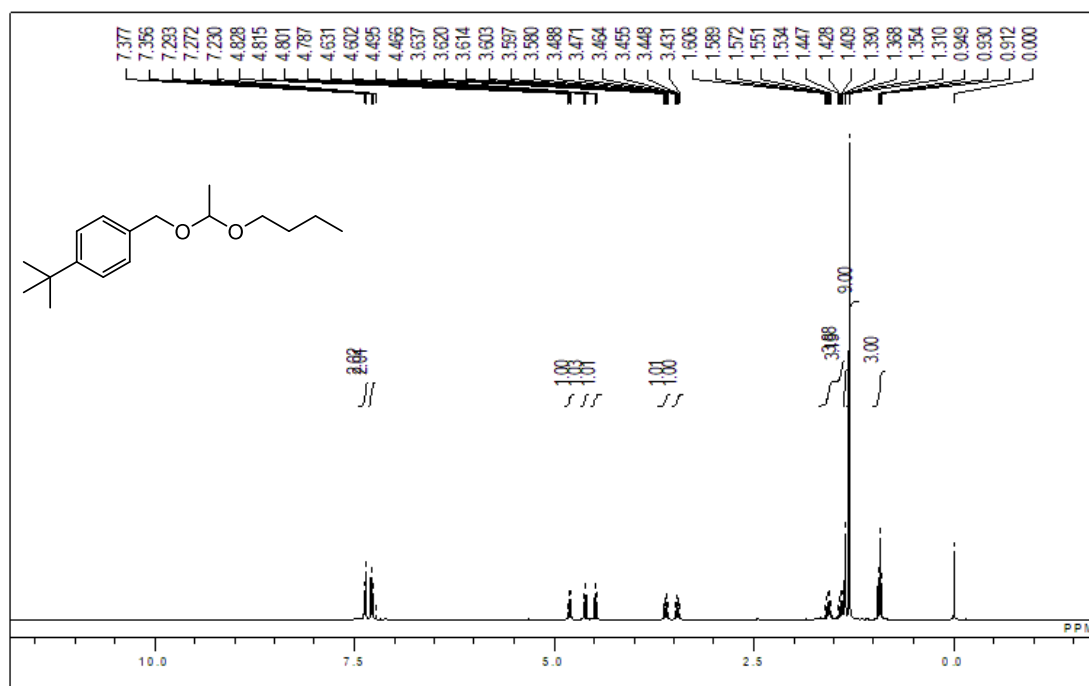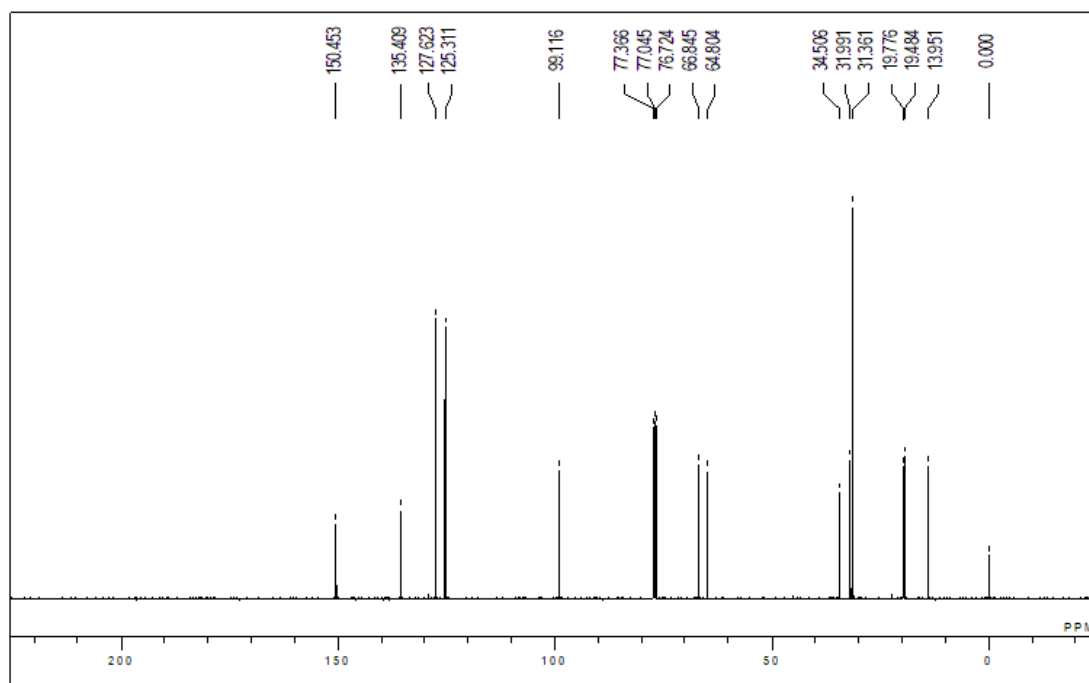

## References

- (1) G. Werner, K. S. Rodygin, A. A. Kostin, E. G. Gordeev, A. S. Kashin and V. P. Ananikov, *Green Chem.*, 2017, **19**, 3032.
- (2) N. Harada, T. Nishikata and H. Nagashima, *Tetrahedron*, 2012, **68**, 3243.
- (3) R. Matake, Y. Adachi and H. Matsubara, *Green Chem.*, 2016, **18**, 2614.
- (4) V. V. Voronin, M. S. Ledovskaya, K. S. Rodyginab and V. P. Ananikov, *Org. Chem. Front.*, 2020, **7**, 1334.
- (5) P. Hu, S. Huang, J. Xu, Z. Shi and W. Su, *Angew. Chem. Int. Ed.*, 2011, **50**, 9926.
- (6) C. Lu, X. Su and P. E. Floreancig, *J. Org. Chem.*, 2013, **78**, 9366.
- (7) K. S. Rodygin, K. A. Lotsman and V. P. Ananikov, *ChemSusChem*, 2020, **13**, 3679.
- (8) Y. Kon, T. Chishiro, D. Imao, T. Nakashima, T. Nagamine, H. Hachiya and K. Sato, *Tetrahedron Letters*, 2011, **52**, 6739.
- (9) N. Palani and K. K. Balasubramanian, *Tetrahedron Lett.*, 1995, **36**, 9527.
- (10) E. S. Huyser and D. T. Wang, *J. Org. Chem.*, 1964, **29**, 2720.
- (11) (a) J. E. McKeon, P. Fitton and A. A. Griswold, *Tetrahedron*, 1972, **28**, 227; (b) J. E. McKeon and P. Fitton, *Tetrahedron*, 1972, **28**, 233; (c) W. H. Watanabe and L. E. Conlon, *J. Am. Chem. Soc.*, 1957, **79**, 2828.
